# Supplementary material for: Relationship between right-to-left shunt and migraine in patients with epilepsy: a single-centre, cross-sectional study in China
Source: PubMed Central journal article supplement — BMJ Open. 2018 Oct 8;8(10):e024144. doi: 10.1136/bmjopen-2018-024144 (PMC6194457; doi:10.1136/bmjopen-2018-024144), 2018-10-08
Supplement: bmjopen-2018-024144.draft_revisions.pdf [file bmjopen-2018-024144.draft_revisions.pdf]

# BMJ Open

BMJ Open is committed to open peer review. As part of this commitment we make the peer review history of every article we publish publicly available.

When an article is published we post the peer reviewers' comments and the authors' responses online. We also post the versions of the paper that were used during peer review. These are the versions that the peer review comments apply to.

The versions of the paper that follow are the versions that were submitted during the peer review process. They are not the versions of record or the final published versions. They should not be cited or distributed as the published version of this manuscript.

BMJ Open is an open access journal and the full, final, typeset and author-corrected version of record of the manuscript is available on our site with no access controls, subscription charges or pay-per-view fees (<http://bmjopen.bmj.com>).

If you have any questions on BMJ Open's open peer review process please email [info.bmjopen@bmj.com](mailto:info.bmjopen@bmj.com)

# BMJ Open

## Relationship between right-to-left shunt and migraine in patients with epilepsy

|                               |                                                                                                                                                                                                                                   |
|-------------------------------|-----------------------------------------------------------------------------------------------------------------------------------------------------------------------------------------------------------------------------------|
| Journal:                      | <i>BMJ Open</i>                                                                                                                                                                                                                   |
| Manuscript ID                 | bmjopen-2018-024144                                                                                                                                                                                                               |
| Article Type:                 | Research                                                                                                                                                                                                                          |
| Date Submitted by the Author: | 12-May-2018                                                                                                                                                                                                                       |
| Complete List of Authors:     | Zhang, Lin<br>Zhu, Xi<br>Qiu, XIangmiao<br>Li, Yajiao<br>Chen, Yucheng<br>Wang, Hui<br>He, Shixu<br>Lai, Wanlin<br>Peng, Anjiao<br>Ning, Mingming<br>Chen, Lei; West China Hospital, Sichuan University, Chengdu, Sichuan, China, |
| Keywords:                     | Epilepsy < NEUROLOGY, Migraine < NEUROLOGY, Right-to-left shunt                                                                                                                                                                   |
|                               |                                                                                                                                                                                                                                   |

SCHOLARONE™  
Manuscripts

## Relationship between right-to-left shunt and migraine in patients with epilepsy

Lin Zhang,<sup>1</sup> Xi Zhu,<sup>1</sup> Xiangmiao Qiu,<sup>1</sup> Yajiao Li,<sup>2</sup> Yucheng Chen,<sup>2</sup> Hui Wang,<sup>2</sup> Shixu He,<sup>1</sup> Wanlin Lai,<sup>1</sup> Anjiao Peng,<sup>1</sup> Mingming Ning,<sup>3</sup> Lei Chen,<sup>1</sup>

<sup>1</sup>Department of Neurology, West China Hospital, Sichuan University, Chengdu, China

<sup>2</sup>Department of Cardiology, West China Hospital, Sichuan University, Chengdu, China

<sup>3</sup>Department of Neurology, Cardio-Neurology Clinic, Massachusetts General Hospital, Harvard Medical School, Boston, USA

Email for each author: Lin Zhang ([zhanglinneur@163.com](mailto:zhanglinneur@163.com)), Xi Zhu ([zhu61900@163.com](mailto:zhu61900@163.com)), Xiangmiao Qiu ([qiuxmiao@126.com](mailto:qiuxmiao@126.com)), Yajiao Li ([liyajiao800@163.com](mailto:liyajiao800@163.com)), Yucheng Chen ([chenyucheng2003@126.com](mailto:chenyucheng2003@126.com)), Hui Wang ([dashu1985723@163.com](mailto:dashu1985723@163.com)), Shixu He ([274464077@qq.com](mailto:274464077@qq.com)), Wanlin Lai ([laiwl93@163.com](mailto:laiwl93@163.com)), Anjiao Peng ([peng\\_neurology@163.com](mailto:peng_neurology@163.com)), Mingming Ning ([Ning@hms.harvard.edu](mailto:Ning@hms.harvard.edu)), Lei Chen ([leilei\\_25@126.com](mailto:leilei_25@126.com))

Key words: right-to-left shunt; epilepsy; migraine

Number of words (main text): 2189

## ABSTRACT

**Objectives** To investigate the relationship between right-to-left shunts (RLS) and migraine to account for the unexplained high prevalence of migraine in patients with epilepsy (PWE).

**Design** This is a cross-sectional study. The diagnosis and interview process of patients with migraine was based on the International Classification of Headache disorders in PWE. Participants underwent transthoracic echocardiography (TTE) with contrast medium to identify RLS. The highest number of microbubbles were recorded in the left atrium before the complete microbubble outflow of the right atrium. Moderate to large RLS was defined as the presence of 10 or more microbubbles.

**Setting** Single-center, 2015-2017.

**Participants** Patients with epilepsy.

**Primary and secondary outcome measures** Main outcome measures were the prevalence of migraine, RLS prevalence in PWE with and without migraine, and the prevalence of migraine in different degree of shunting.

**Results** Three hundred and thirty-nine participants with epilepsy who completed TTE were included in the analysis. The overall prevalence of migraine was 23.0%. Almost one-third of migraineurs have mild RLS and one-fifth of migraineurs have moderate to large RLS. Patients with mild RLS did not have a higher prevalence of migraine than those without RLS (26.3% vs 18.1%,  $p = 0.102$ ), however, a higher prevalence of migraine was found in patients with moderate to large RLS (39.0% vs 18.1%, odds ratio = 2.90, 95% confidence interval = 1.41 to 5.98,  $p = 0.003$ ). PWE with and without migraine had similar prevalence of mild RLS, however, patients with migraine had more moderate to large RLS (20.5% vs 9.6%,  $p=0.002$ ). RLS, older age and female were factors predicting migraine prevalence.

1  
2  
3 **Conclusions** Almost one-fifth of migraineurs were correlated with moderate-to-large  
4 RLS which could be an underlying cause of migraine in epilepsy. PWE with migraine  
5 should be screened for RLS.  
6  
7  
8  
9

10  
11 **Strengths and limitations of this study**  
12

- 13 ▶ Cohort study with data from a large number of patients with epilepsy.  
14  
15 ▶ We firstly studied the relationship between the degree of shunts and migraine in  
16 patients with epilepsy.  
17  
18 ▶ Transthoracic echocardiography with contrast medium was used as a tool to detect  
19 right-to-left shunt but not transoesophageal echocardiography.  
20  
21  
22  
23  
24  
25  
26  
27  
28  
29  
30  
31  
32  
33  
34  
35  
36  
37  
38  
39  
40  
41  
42  
43  
44  
45  
46  
47  
48  
49  
50  
51  
52  
53  
54  
55  
56  
57  
58  
59  
60

## INTRODUCTION

Comorbidity of migraine is common in patients with epilepsy (PWE). The lifetime occurrence of migraine was up to 33.6% of PWE, representing an overall 52% increase relative to people without epilepsy.<sup>1 2</sup> Comorbid migraine may have an unfavourable effect on the prognosis of epilepsy in children and adults.<sup>3 4</sup> Evidence of genetics and animal experiments suggested similar pathophysiological mechanisms between migraine and familial epilepsy, such as genetic variants and abnormal neuronal excitability.<sup>5-9</sup> Despite these findings, the mechanisms underlying migraine in PWE are still controversial.

In the past 2 decades, right-to-left shunt (RLS), usually due to patent foramen ovale (PFO) and pulmonary arteriovenous shunts, have been found to be associated with migraine. Three-fold higher migraine with aura was observed in patients with PFO compared to people without PFO.<sup>10</sup> There are clinical trials showing that patients with PFO closure had a significantly greater reduction in headache days although responder rate defined as 50% reduction in migraine attacks is not different.<sup>11 12</sup> In addition, the meta-analyses showed a complete resolution of migraine post-PFO closure occurred in 54% of migraine-with-aura cases and in 39% of migraine-without-aura cases.<sup>13 14</sup> Therefore, PFO may be a fundamental cause in migraine. One of the possible mechanisms between the 2 conditions is that vasoactive chemicals triggering migraine bypass the pulmonary filter.<sup>5</sup> In addition, the presence of microemboli in patients with PFO is higher than in patients without PFO.<sup>15</sup> Animal experiments showed that microemboli can trigger the aura phenomenon by inducing cortical spreading depression (CSD).<sup>7</sup>

Similarly, PFO may also induced migraine by vasoactive chemicals and microemboli in PWE. Therefore, our main aim was to investigate the relationship

1  
2  
3 between RLS and migraine to account for the unexplained high prevalence of  
4 migraine in epilepsy. We also investigated other migraine predictive factors, for  
5 example, sex, age, familial epilepsy, duration of epilepsy and antiepileptic drugs  
6 (AEDs).  
7  
8  
9  
10

## 11 12 13 **METHODS**

### 14 **Study design and patients**

15  
16 This is a cross-sectional study. Study populations were consecutively recruited  
17 between June 2015 and December 2017 from the Department of Neurology, West  
18 China Hospital, Sichuan University, China. Participants or legal guardians signed  
19 informed consent. Exclusion criteria were as follows: (1) age <3 years; (2) inaccurate  
20 communication because of language problems; (3) patients with one seizure (because  
21 high recurrence risk factors are controversial) and provoked seizures; (4)  
22 undetermined diagnosis of epilepsy; (5) clinical history of epilepsy including onset  
23 age of seizure, AEDs, familial history of epilepsy, seizure frequency in the last year  
24 and types of seizure were not recorded; (6) history of heart disease except RLS; (7)  
25 RLS confirmed by transthoracic echocardiography (TTE) at another hospital (because  
26 there may be differences between sonographers); and (8) informed consent not signed.  
27  
28  
29  
30  
31  
32  
33  
34  
35  
36  
37  
38  
39  
40  
41  
42  
43

### 44 **Definitions and collection of data**

45  
46 A definitive diagnosis and classification of epilepsy met the criteria proposed by the  
47 International League Against Epilepsy (ILAE) based on clinical history, seizure  
48 semiology, electroencephalography (EEG) and magnetic resonance imaging (MRI)  
49 findings.<sup>16</sup> For each patient, age, symptoms of seizure, onset age of seizure, AEDs,  
50 education status, seizure onset with visual symptoms, history of febrile seizure,  
51  
52  
53  
54  
55  
56  
57  
58  
59  
60

1  
2  
3 seizure frequency in the last year, familial history of epilepsy and types of seizure  
4 (focal onset, focal to bilateral tonic-clonic seizures, or generalized onset) were  
5 recorded.  
6  
7

8  
9 The diagnosis and interview process for patients with migraine were based on the  
10 International Classification of Headache disorders (ICHD-3 beta).<sup>17</sup> The numbers of  
11 migraine attacks, estimated duration of migraine, location, quality, intensity (visual  
12 analogue scale, 0-10) and aura were recorded. Patients would not be classified as  
13 having migraine if only postictal and ictal migrainous headache occurred because  
14 ICHD-3 beta does not have related criteria. Every patient was diagnosed by 2  
15 neurologists separately. If the diagnosis of epilepsy and migraine was inconsistent, a  
16 third senior neurologist was asked to discuss the case further.  
17  
18  
19  
20  
21  
22  
23  
24  
25

26 For children, their parents (or the children themselves if they were old enough)  
27 were asked to give specific information about epilepsy and migraine. Medical records  
28 and seizure diaries during the last 12 months were reviewed to obtain information  
29 regarding the history of epilepsy and migraine, EEG and MRI.  
30  
31  
32  
33  
34  
35  
36  
37

### 38 **Transthoracic Echocardiography**

39 Participants underwent transthoracic echocardiography (TTE) with contrast medium  
40 and 1-5 MHz or 3-8MHz multiplane transducers in Philips IE33 to identify RLS; this  
41 was performed by 2 experienced sonographers who also analysed the videotapes  
42 together. Patients with other cardiac diseases (such as valvular heart diseases and  
43 cardiomyopathy) found by TTE were excluded. A microbubble bolus of agitated  
44 solution of 9 mL saline and 1 mL air was injected into one side of the patients'  
45 antecubital veins for increased sensitivity.<sup>18 19</sup> Patients were assessed for an RLS at  
46 rest and during Valsalva's manoeuvre and coughing. The highest number of  
47  
48  
49  
50  
51  
52  
53  
54  
55  
56  
57  
58  
59  
60



1  
2  
3 microbubbles were recorded in the left atrium before the complete microbubble  
4  
5 outflow of the right atrium. If 3 or more microbubbles appeared, an RLS was  
6  
7 diagnosed. The degree of shunting was defined as grade 0 if 0 to 2 microbubbles  
8  
9 occurred, grade 1 (mild) if 3 to 9 microbubbles occurred, grade 2 (moderate) if 10 to  
10  
11 30 microbubbles occurred and grade 3 (large) if more than 30 microbubbles  
12  
13 occurred.<sup>20</sup>  
14  
15

### 16 17 18 **Data analysis**

19  
20 Data were collected using the same standard forms in Microsoft Excel (version 2013).  
21  
22 Continuous variables were compared by ANOVA. Categorical variables were  
23  
24 compared using the  $\chi^2$  test or Fisher's exact test, as appropriate. Bonferroni correction  
25  
26 was used if necessary. Logistic regression analyses were used to determine whether  
27  
28 some variables were migraine-predicting factors. For all statistical tests,  $p < 0.05$  was  
29  
30 determined to be statistically significant. Statistics were performed using the SPSS  
31  
32 statistical package (version 21.0).  
33  
34  
35  
36  
37

### 38 **Patient and public involvement**

39  
40 The development of the research question and outcome measures were informed by  
41  
42 published literature on PFO and migraine. Patients' priorities, experience and  
43  
44 preferences were not involved in designing the study. Patients who agreed to enrol to  
45  
46 the study received TTE. The recruitment process was mentioned in the Study design  
47  
48 and patients section. Two authors (Lin Zhang and Xi Zhu) disseminated the results to  
49  
50 the study participants by interviews.  
51  
52  
53

## 54 **RESULTS**

1  
2  
3 We carefully interviewed 532 patients with seizure (s) or (and) their parents. One  
4  
5 hundred and sixty-one patients were excluded. The reasons for exclusion were  
6  
7 showed in figure 1. Three hundred and thirty-nine participants with epilepsy who  
8  
9 completed the interview process of migraine and TTE were included in the analysis.  
10  
11 The details of migraine features according to the ICHD-3 beta criteria showed in the  
12  
13 supplementary. The overall prevalence of migraine was 23.0% (table 1). A greater  
14  
15 percentage of females had migraines than males (28.8% vs 17.2%,  $p = 0.022$ ).  
16  
17 Patients  $> 16$  years seemed to have higher prevalence of migraine than those  $\leq 16$   
18  
19 years of age (25.7% vs 11.0%,  $p = 0.039$ ). If the duration of epilepsy was  $> 10$  years,  
20  
21 patients were more likely to have migraines (34.6% vs 17.9%,  $p = 0.001$ ). Patients  
22  
23 with polytherapy may have more migraines (28.0% vs 19.0%,  $p = 0.052$ ). Patients  
24  
25 with first-degree and second-degree relatives with epilepsy may have not more  
26  
27 migraines.  
28  
29  
30

31 Almost one-third of migraineurs have mild RLS and one-fifth of migraineurs have  
32  
33 moderate to large RLS (table 1 and table 2). Patients with mild RLS did not have a  
34  
35 higher prevalence of migraine than those without RLS (26.3% vs 18.1%, odds ratio =  
36  
37 1.61, 95% confidence interval = 0.91 to 2.87,  $p = 0.102$ ). In our cohort, 33.3% (26 of  
38  
39 78) of PWE with migraine and 28.0% (73 of 261) of PWE without migraine had mild  
40  
41 RLS ( $p = 0.361$ ).  
42  
43

44 Patients with moderate to large RLS had a higher prevalence of migraine than those  
45  
46 without RLS (39.0% vs 18.1%, odds ratio = 2.90, 95% confidence interval = 1.41 to  
47  
48 5.98,  $p = 0.003$ , table 1 and table 2). Twenty-one percent (16 of 78) of PWE with  
49  
50 migraine had moderate to large RLS; whereas only 10% (25 of 261) of PWE without  
51  
52 migraine had moderate to large RLS (odds ratio = 2.44, 95% confidence interval =  
53  
54 1.23 to 4.84,  $p=0.002$ ). After controlling the potential confounders, there are  
55  
56  
57  
58  
59  
60

1  
2  
3 significant differences of migraine prevalence between the groups with RLS grade 2-3  
4 versus the group with RLS grade 0 (table 2). Therefore, moderate to large RLS but not  
5 mild RLS was associated with migraine in PWE.  
6  
7

8  
9 We used a logistic regression analysis to identify the possible factors predicting  
10 migraine prevalence, such as sex, onset age, duration of epilepsy, current age, RLS  
11 and AEDs (table 3). RLS, older age and female were factors predicting migraine  
12 prevalence. Although patients with duration of epilepsy >10 years seemed to have  
13 higher migraine prevalence (table 1), the logistic regression analysis showed longer  
14 duration of epilepsy may be not a predictive factor.  
15  
16  
17  
18  
19  
20  
21

22 PFO closure were performed in 7 patients. Four patients were followed for 6 month.  
23 We found that PFO closure full control migraine in 2 of 4 cases. Before PFO closure,  
24 the two patients have more than 11 migraine attacks in the last year. More interesting,  
25 the frequency of seizures in 3 patients with migraine after PFO closure decreased  
26 significantly.  
27  
28  
29  
30  
31  
32  
33  
34

## 35 **DISCUSSION**

36 This is the first study to evaluate the relationship between migraine and RLS in a  
37 large number of PWE. Our main findings were as follows: 1) Almost one-third of  
38 migraineurs have mild RLS and one-fifth of migraineurs have moderate to large RLS;  
39 2) mild RLS did not have a higher prevalence of migraine than those without RLS; 3)  
40 moderate to large RLS was associated with migraine in PWE and 4) RLS, older age  
41 and female were factors predicting migraine prevalence in PWE.  
42  
43  
44  
45  
46  
47  
48  
49

50 The pathophysiological mechanisms of migraine in PWE were usually considered  
51 to be common genetic variants and abnormal neuronal excitability.<sup>5-9</sup> Our major  
52 hypothesis was that RLS may be one of pathophysiological mechanisms of migraine  
53  
54  
55  
56  
57  
58  
59  
60

1  
2  
3 in PWE. The results showed that mild RLS were not associated with migraine in PWE.  
4  
5 Almost one-fifth of migraine were correlated with moderate-to-large RLS which  
6  
7 could be an underlying cause of migraine in epilepsy. The mechanisms of the  
8  
9 relationship between moderate to large RLS and migraine remains speculative. A  
10  
11 previous study showed larger RLS tend to trigger migraine attacks because of the  
12  
13 increased extent of the shunt.<sup>21</sup> Larger shunts allow harmful circulatory factors, such  
14  
15 as vasoactive substances and microemboli which are eliminated by lung, to bypass the  
16  
17 pulmonary filter and travel directly from the venous to the cerebral artery. PFO and  
18  
19 higher rates of Doppler-detected cerebral microemboli have been reported to be  
20  
21 associated.<sup>22</sup> In an animal experiment, air microemboli are able to trigger cortical  
22  
23 spreading depression (CSD) and migraine aura often with transient microvascular  
24  
25 occlusion which is insufficient to cause a permanent ischemic lesion.<sup>7</sup> In human,  
26  
27 diagnostic microbubble injection also induced attacks of migraine with aura.<sup>23</sup>  
28  
29 Therefore, microemboli may be a key role linking CSD, migraine and moderate to  
30  
31 large RLS.  
32  
33

34  
35 More interesting, CSD increases neuronal excitability and triggers ictal activity  
36  
37 in neuronal tissues with partial impairment of inhibitory.<sup>9</sup> CSD also triggers migraine  
38  
39 headache by activating neuronal Panx1 channels which contributes to neuronal  
40  
41 hyperactivity in seizures.<sup>24 25</sup> These may explain why migraine may have an  
42  
43 unfavourable effect on the prognosis of epilepsy.<sup>3 4</sup> Therefore, moderate to large RLS  
44  
45 may be not only an underlying cause of migraine but also an adverse prognostic  
46  
47 factors in PWE. Whether moderate to large RLS is an adverse prognostic factors in  
48  
49 epilepsy should be also investigated.  
50  
51

52  
53 We also investigated other migraine-predicting factors. Age showed effect on the  
54  
55 migraine prevalence and logistic regression analysis also showed that age was a  
56  
57  
58  
59  
60

1  
2  
3 predicting factor of migraine. There are some possible explanations for this finding.  
4  
5 Previous studies found that PFO length and diameter increased with age which  
6  
7 implied the shunts also increased with age.<sup>26</sup> Larger shunts are more likely to trigger  
8  
9 migraine attacks.<sup>21</sup> In addition, more cases of migraine would be diagnosed if  
10  
11 migraine occurred repeatedly as the duration of epilepsy became longer. Our results  
12  
13 also support the hypothesis that age affected migraine prevalence.  
14

15  
16 The effect of PFO closure for migraine treatment still remain controversial, but a  
17  
18 number of researches have proved to be effective, in particular in migraine with aura.  
19  
20 <sup>13 14</sup> In our cohort, we also found PFO closure full control migraine in 2 of 4 cases.  
21  
22 More interesting, the frequency of seizures in 3 patients with migraine after PFO  
23  
24 closure decreased significantly. Although the effect of PFO closure in these cases  
25  
26 needed to be explained with caution, it is worth investigating whether PFO closure  
27  
28 improved migraine attacks and seizure outcomes in future.  
29

30  
31 This study has some limitations. First, transoesophageal echocardiography (TEE) is  
32  
33 a gold standard diagnosis tool with a sensitivity and specificity of 80% to 100% for  
34  
35 detection of an RLS.<sup>18 19</sup> The contrast TTE used by us has a lower sensitivity than  
36  
37 TEE.<sup>18</sup> However, harmonic imaging improves sensitivity for the detection of RLS,  
38  
39 ranging from 66% to 100%.<sup>18 19 27 28</sup> In addition, TTE is not inferior to TEE in the  
40  
41 assessment of large shunts because TEE may miss large shunts detected by TTE.<sup>28</sup> In  
42  
43 our study, moderate to large RLS are more likely to be associated with migraine,  
44  
45 therefore, TTE may not be an inferior choice to TEE. Second, the population may be  
46  
47 biased because a few patients did not complete TTE. However, there were no  
48  
49 differences in demographic characteristics between patients who did or did not refuse  
50  
51 TTE and the conclusions of our study should not be affected. Third, only Chinese  
52  
53 were recruited, and this limits generalizability of results.  
54  
55  
56  
57  
58  
59  
60

## CONCLUSIONS

Moderate to large RLS but not mild RLS was associated with migraine. Based on these results, PWE with migraine should be screened for RLS. Whether moderate to large RLS is an adverse prognostic factors in epilepsy should be also investigated.

**Acknowledgements** No patients advisers involved in the study. We thank Dr. Qi Si for her help.

**Contributors** Lei Chen and Mingming Ning conceived and designed the work. Lin Zhang and Xi Zhu were involved in data collection, data analysis and interpretation. Lin Zhang drafted the manuscript. Lei Chen involved in critical revision of the article and final approval of the version to be published. Xiangmiao Qiu, Xiangmiao Qiu, Shixu He, Anjiao Peng, Wanlin Lai, Yajiao Li, Yucheng Chen, and Hui Wang were involved in the data collection and final approval of the version to be published. All authors have agreed to be accountable for all aspects of the work.

**Funding** Funding for this study was provided by China Association Against Epilepsy (No.2016005).

**Competing interests** None declared.

**Patient consent** Obtained.

**Ethics approval** The protocol was approved by the Ethics Committee of the West

1  
2  
3 China Hospital of Sichuan University.  
4  
5  
6

7 **Data sharing statement** No additional data available.  
8  
9

10  
11 **REFERENCES**  
12

- 13  
14 1. Keezer MR, Bauer PR, Ferrari MD, et al. The comorbid relationship between  
15 migraine and epilepsy: a systematic review and meta-analysis. *Eur J Neurol*  
16 2015;22:1038-47.  
17  
18 2. Le H, Tfelt-Hansen P, Russell MB, et al. Co-morbidity of migraine with somatic  
19 disease in a large population-based study. *Cephalalgia* 2011;31:43-64.  
20  
21 3. Dragoumi P, Tzetzzi O, Vargiami E, et al. Clinical course and seizure outcome of  
22 idiopathic childhood epilepsy: determinants of early and long-term prognosis. *BMC*  
23 *Neurol* 2013;13:206.  
24  
25 4. Velioglu SK, Boz C, Ozmenoglu M. The impact of migraine on epilepsy: a  
26 prospective prognosis study. *Cephalalgia* 2005;25:528-35.  
27  
28 5. Finocchi C, Del Sette M. Migraine with aura and patent foramen ovale: myth or  
29 reality? *Neurol Sci* 2015;36 Suppl 1:61-6.  
30  
31 6. Ludvigsson P, Hesdorffer D, Olafsson E, et al. Migraine with aura is a risk factor  
32 for unprovoked seizures in children. *Ann Neurol* 2006;59:210-3.  
33  
34 7. Nozari A, Dilekoz E, Sukhotinsky I, et al. Microemboli may link spreading  
35 depression, migraine aura, and patent foramen ovale. *Ann Neurol* 2010;67:221-9.  
36  
37 8. Winawer MR, Connors R. Evidence for a shared genetic susceptibility to migraine  
38 and epilepsy. *Epilepsia* 2013;54:288-95.  
39  
40  
41  
42  
43  
44  
45  
46  
47  
48  
49  
50  
51  
52  
53  
54  
55  
56  
57  
58  
59  
60

- 1  
2  
3  
4  
5  
6  
7  
8  
9  
10  
11  
12  
13  
14  
15  
16  
17  
18  
19  
20  
21  
22  
23  
24  
25  
26  
27  
28  
29  
30  
31  
32  
33  
34  
35  
36  
37  
38  
39  
40  
41  
42  
43  
44  
45  
46  
47  
48  
49  
50  
51  
52  
53  
54  
55  
56  
57  
58  
59  
60
9. Eickhoff M, Kovac S, Shahabi P, et al. Spreading depression triggers ictiform activity in partially disinhibited neuronal tissues. *Exp Neurol* 2014;253:1-15.
10. Takagi H, Umemoto T. A meta-analysis of case-control studies of the association of migraine and patent foramen ovale. *J Cardiol* 2016;67:493-503.
11. Xing YQ, Guo YZ, Gao YS, et al. Effectiveness and Safety of Transcatheter Patent Foramen Ovale Closure for Migraine (EASTFORM) Trial. *Sci Rep* 2016;6:39081.
12. Tobis JM, Charles A, Silberstein SD, et al. Percutaneous Closure of Patent Foramen Ovale in Patients With Migraine: The PREMIUM Trial. *J Am Coll Cardiol* 2017;70:2766-74.
13. Kanwar SM, Noheria A, DeSimone CV, et al. Coincidental Impact of Transcatheter Patent Foramen Ovale Closure on Migraine with and without Aura - A Comprehensive Meta-Analysis. *Clin Trials Regul Sci Cardiol* 2016;15:7-13.
14. Shi YJ, Lv J, Han XT, et al. Migraine and percutaneous patent foramen ovale closure: a systematic review and meta-analysis. *BMC Cardiovasc Disord* 2017;17:203.
15. Shariat A, Yaghoubi E, Nemati R, et al. Microembolic signals in patients with cryptogenic stroke with or without patent foramen ovale. *J Stroke Cerebrovasc Dis* 2012;21:662-6.
16. Fisher RS, Cross JH, French JA, et al. Operational classification of seizure types by the International League Against Epilepsy: Position Paper of the ILAE Commission for Classification and Terminology. *Epilepsia* 2017;58:522-30.
17. Ettl DA. *The International Classification of Headache Disorders, 3rd edition*



- (beta version). *Cephalalgia* 2013;33:629-808.
18. Cotter PE, Martin PJ, Belham M. Improved sensitivity of transthoracic contrast echocardiography in the detection of right-to-left shunts. *J Am Soc Echocardiogr* 2010;23:578; author reply 78-9.
19. Ha JW, Shin MS, Kang S, et al. Enhanced detection of right-to-left shunt through patent foramen ovale by transthoracic contrast echocardiography using harmonic imaging. *Am J Cardiol* 2001;87:669-71, a11.
20. Mas JL, Arquizan C, Lamy C, et al. Recurrent cerebrovascular events associated with patent foramen ovale, atrial septal aneurysm, or both. *N Engl J Med* 2001;345:1740-6.
21. Tembl J, Lago A, Sevilla T, et al. Migraine, patent foramen ovale and migraine triggers. *J Headache Pain* 2007;8:7-12.
22. Rodriguez RA, Sinclair B, Weatherdon D, et al. Patent foramen ovale and brain microembolization during scoliosis surgery in adolescents. *Spine (Phila Pa 1976)* 2001;26:1719-21.
23. Dinia L, Roccatagliata L, Bonzano L, et al. Diffusion MRI during migraine with aura attack associated with diagnostic microbubbles injection in subjects with large PFO. *Headache* 2007;47:1455-6.
24. Karatas H, Erdener SE, Gursoy-Ozdemir Y, et al. Spreading depression triggers headache by activating neuronal Panx1 channels. *Science* 2013;339:1092-5.
25. Santiago MF, Veliskova J, Patel NK, et al. Targeting pannexin1 improves seizure outcome. *PLoS One* 2011;6:e25178.

- 1  
2  
3  
4 26. McKenzie JA, Edwards WD, Hagler DJ. Anatomy of the patent foramen ovale for  
5  
6 the interventionalist. *Catheter Cardiovasc Interv* 2009;73:821-6.  
7  
8  
9 27. Clarke NR, Timperley J, Kelion AD, et al. Transthoracic echocardiography using  
10  
11 second harmonic imaging with Valsalva manoeuvre for the detection of right to  
12  
13 left shunts. *Eur J Echocardiogr* 2004;5:176-81.  
14  
15  
16 28. Daniels C, Weytjens C, Cosyns B, et al. Second harmonic transthoracic  
17  
18 echocardiography: the new reference screening method for the detection of patent  
19  
20 foramen ovale. *Eur J Echocardiogr* 2004;5:449-52.  
21  
22  
23  
24  
25  
26  
27  
28  
29  
30  
31  
32  
33  
34  
35  
36  
37  
38  
39  
40  
41  
42  
43  
44  
45  
46  
47  
48  
49  
50  
51  
52  
53  
54  
55  
56  
57  
58  
59  
60

**Table 1 Migraine prevalence in different groups**

| Characteristics                                  | Sample | Migraine (%) | P                  |
|--------------------------------------------------|--------|--------------|--------------------|
| Male                                             | 169    | 29 (17.2)    | 0.022              |
| Female                                           | 170    | 49 (28.8)    |                    |
| Current age, years                               |        |              | 0.039              |
| ≤16                                              | 82     | 12 (11.0)    |                    |
| >16                                              | 257    | 66 (25.7)    |                    |
| Duration of epilepsy, years                      |        |              | 0.001              |
| ≤10                                              | 235    | 42 (17.9)    |                    |
| >10                                              | 104    | 36 (34.6)    |                    |
| Onset age, years                                 |        |              |                    |
| ≤16                                              | 183    | 39 (21.3)    | 0.421              |
| >16                                              | 156    | 39 (25.0)    |                    |
| Seizures onset with visual symptoms <sup>a</sup> | 21     | 5 (23.8)     | 1.000 <sup>b</sup> |
|                                                  | 293    | 69 (23.5)    |                    |
| History of febrile seizures <sup>a</sup>         | 39     | 9 (23.1)     | 0.865              |
|                                                  | 259    | 63 (24.3)    |                    |
| AEDs < or = 1                                    | 189    | 36 (19.0)    | 0.052              |
| AEDs > or = 2                                    | 150    | 42 (28.0)    |                    |
| Seizure types                                    |        |              | 0.319              |
| Focal onset seizure                              | 68     | 10 (14.7)    |                    |
| Generalized onset seizure and                    | 227    | 58 (25.6)    |                    |
| FBTCS                                            |        |              |                    |
| Undetermined                                     | 44     | 10 (22.7)    |                    |
| Familial epilepsy                                | 11     | 5 (45.5)     | 0.135 <sup>b</sup> |

|    |                         |     |           |       |
|----|-------------------------|-----|-----------|-------|
| 1  |                         |     |           |       |
| 2  |                         |     |           |       |
| 3  | First-degree relatives  | 9   | 4 (44.4)  |       |
| 4  |                         |     |           |       |
| 5  | Second-degree relatives | 2   | 1 (50.0)  |       |
| 6  |                         |     |           |       |
| 7  | No familial epilepsy    | 328 | 73 (22.3) |       |
| 8  |                         |     |           |       |
| 9  | RLS grade 1             | 99  | 26 (26.3) | 0.102 |
| 10 |                         |     |           |       |
| 11 | RLS grade 2-3           | 41  | 16 (39.0) | 0.003 |
| 12 |                         |     |           |       |
| 13 | RLS grade 1-3           | 140 | 42 (29.6) | 0.010 |
| 14 |                         |     |           |       |
| 15 | RLS grade 0             | 199 | 36 (18.1) |       |
| 16 |                         |     |           |       |
| 17 |                         |     |           |       |

---

<sup>a</sup> Cases with uncertain history were excluded.

<sup>b</sup> Fisher's exact test

AEDs, antiepileptic drugs; FBTCS, focal to bilateral tonic-clonic seizures;

RLS, right-to-left shunt.

**Table 2 High prevalence of migraine in patients with moderate to large RLS**

| Characteristics                    | Right-to-left shunting |              |               | P     |
|------------------------------------|------------------------|--------------|---------------|-------|
|                                    | Grade 2-3 (41)         | Grade 1 (99) | Grade 0 (199) |       |
| Male                               | 17                     | 52           | 100           | 0.413 |
| Age, years                         | 26.9 ± 11.7            | 27.6 ± 13.7  | 26.4 ± 13.2   | 0.769 |
| Onset age, years                   | 19.3 ± 11.2            | 17.9 ± 12.4  | 17.8 ± 12.3   | 0.779 |
| Duration, years                    | 8.1 ± 8.9              | 9.7 ± 9.6    | 8.7 ± 9.1     | 0.580 |
| Familial epilepsy                  | 2                      | 2            | 7             | 0.648 |
| Education, years                   |                        |              |               | 0.772 |
| 0-6                                | 13                     | 24           | 52            | 0.645 |
| 7-12                               | 20                     | 47           | 104           |       |
| ≥13                                | 8                      | 28           | 43            |       |
| Seizure types                      |                        |              |               | 0.085 |
| Focal onset                        | 7                      | 22           | 39            |       |
| Generalized onset                  | 32                     | 69           | 126           |       |
| seizure and FBTCS                  |                        |              |               |       |
| Undetermined                       | 2                      | 8            | 34            |       |
| Seizure frequency in the last year |                        |              |               | 0.170 |
| 0-12                               | 27                     | 71           | 142           |       |
| 13-52                              | 3                      | 14           | 16            |       |
| >52                                | 6                      | 8            | 14            |       |
| Unknown                            | 5                      | 6            | 28            |       |
| AEDs < or = 1                      | 25                     | 47           | 117           | 0.139 |
| AEDs > or = 2                      | 16                     | 52           | 82            |       |

|    |                     |    |    |    |                    |
|----|---------------------|----|----|----|--------------------|
| 1  |                     |    |    |    |                    |
| 2  |                     |    |    |    |                    |
| 3  | Antiepileptic drugs |    |    |    | 0.382              |
| 4  |                     |    |    |    |                    |
| 5  | Topiramate          | 10 | 21 | 35 |                    |
| 6  |                     |    |    |    |                    |
| 7  | Valproate           | 8  | 45 | 74 |                    |
| 8  |                     |    |    |    |                    |
| 9  | Levetiracetam       | 15 | 31 | 48 |                    |
| 10 |                     |    |    |    |                    |
| 11 | Oxcarbazepine       | 12 | 34 | 48 |                    |
| 12 |                     |    |    |    |                    |
| 13 | Migraine            | 16 | 26 | 36 | 0.010 <sup>a</sup> |
| 14 |                     |    |    |    |                    |

---

15  
16 The continuous data are presented as mean  $\pm$  standard deviation.

17  
18 <sup>a</sup> Bonferroni correction show statistical differences in grade 2-3 versus grade 0.

19  
20 RLS, right-to-left shunt; FBTCS, focal to bilateral tonic-clonic seizures.

**Table 3 Logistic regression analysis for migraine predictor**

| Characteristics      | Odds ratio | 95% confidence interval |       | P     |
|----------------------|------------|-------------------------|-------|-------|
|                      |            | Lower                   | Upper |       |
| Male                 | 0.402      | 0.217                   | 0.745 | 0.004 |
| Age                  | 1.038      | 1.010                   | 1.067 | 0.007 |
| Right-to-left shunt  | 2.544      | 1.392                   | 4.650 | 0.002 |
| Duration of epilepsy | 1.023      | 0.987                   | 1.061 | 0.214 |
| Seizure frequency    | 1.082      | 0.811                   | 1.443 | 0.593 |
| Familial epilepsy    | 2.372      | 0.596                   | 9.444 | 0.220 |
| Valproate            | 1.300      | 0.752                   | 2.248 | 0.347 |
| Levetiracetam        | 0.914      | 0.483                   | 1.731 | 0.782 |
| Oxcarbazepine        | 0.741      | 0.386                   | 1.420 | 0.366 |
| Topiramate           | 1.639      | 0.806                   | 3.333 | 0.173 |
| Lamotrigine          | 0.551      | 0.142                   | 2.146 | 0.390 |
| Carbamazepine        | 0.768      | 0.373                   | 1.582 | 0.474 |
| Phenytoin            | 0.425      | 0.113                   | 1.604 | 0.207 |
| Phenobarbital        | 0.494      | 0.081                   | 3.003 | 0.444 |

1  
2  
3  
4  
5  
6  
7 **Figure legends**  
8

9 Figure 1. The flow diagram  
10  
11  
12  
13  
14  
15  
16  
17  
18  
19  
20  
21  
22  
23  
24  
25  
26  
27  
28  
29  
30  
31  
32  
33  
34  
35  
36  
37  
38  
39  
40  
41  
42  
43  
44  
45  
46  
47  
48  
49  
50  
51  
52  
53  
54  
55  
56  
57  
58  
59  
60

For peer review only



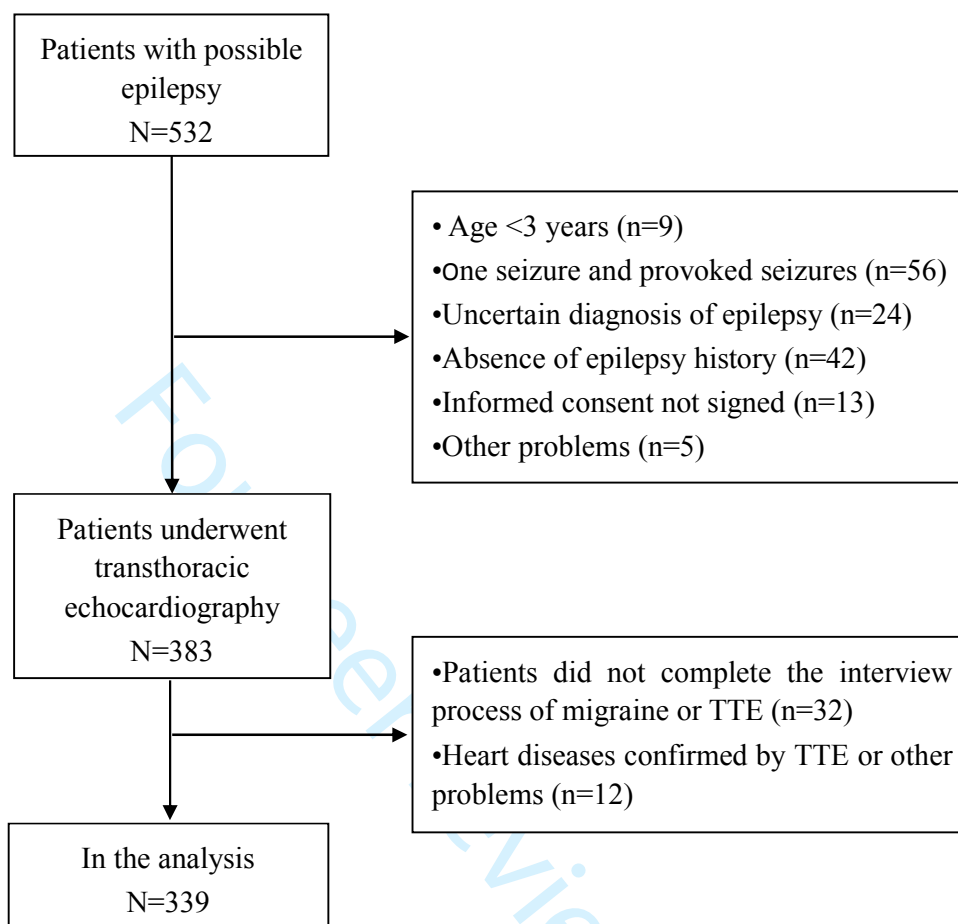

**sTable 1** Characteristics of migraine

| Characteristics                                                               | N=78 |
|-------------------------------------------------------------------------------|------|
| Criteria                                                                      |      |
| Duration >2 hours (<18 years) or > 4 hours ( $\geq$ 18 years) <sup>1</sup>    | 78   |
| At least 5 (without aura) attacks or 2 (with aura) attacks <sup>1</sup>       | 78   |
| Headache has at least two of the following four characteristics               | 78   |
| Location                                                                      |      |
| Left or Right <sup>1</sup>                                                    | 46   |
| Bilateral                                                                     | 32   |
| Intensity <sup>1,2</sup>                                                      |      |
| 0-3                                                                           | 17   |
| 4-10 <sup>1</sup>                                                             | 61   |
| Pulsating quality <sup>1</sup>                                                | 53   |
| Aggravation by or causing avoidance of routine physical activity <sup>1</sup> | 51   |
| During headache at least one of the following                                 | 78   |
| Nausea and/or vomiting <sup>1</sup>                                           | 62   |
| Photophobia and Phonophobia <sup>1</sup>                                      | 55   |

<sup>1</sup>Diagnostic criteria of International Classification of Headache Disorders–3 criteria (beta)

<sup>2</sup>Visual analogue scale scores

**STROBE 2007 (v4) Statement—Checklist of items that should be included in reports of *cross-sectional studies***

| Section/Topic                | Item # | Recommendation                                                                                                                                                                       | Reported on page # |
|------------------------------|--------|--------------------------------------------------------------------------------------------------------------------------------------------------------------------------------------|--------------------|
| <b>Title and abstract</b>    | 1      | (a) Indicate the study's design with a commonly used term in the title or the abstract                                                                                               | 1                  |
|                              |        | (b) Provide in the abstract an informative and balanced summary of what was done and what was found                                                                                  | 2                  |
| <b>Introduction</b>          |        |                                                                                                                                                                                      |                    |
| Background/rationale         | 2      | Explain the scientific background and rationale for the investigation being reported                                                                                                 | 3                  |
| Objectives                   | 3      | State specific objectives, including any prespecified hypotheses                                                                                                                     | 4                  |
| <b>Methods</b>               |        |                                                                                                                                                                                      |                    |
| Study design                 | 4      | Present key elements of study design early in the paper                                                                                                                              | 5                  |
| Setting                      | 5      | Describe the setting, locations, and relevant dates, including periods of recruitment, exposure, follow-up, and data collection                                                      | 5                  |
| Participants                 | 6      | (a) Give the eligibility criteria, and the sources and methods of selection of participants                                                                                          | 5                  |
| Variables                    | 7      | Clearly define all outcomes, exposures, predictors, potential confounders, and effect modifiers. Give diagnostic criteria, if applicable                                             | 5,6                |
| Data sources/<br>measurement | 8*     | For each variable of interest, give sources of data and details of methods of assessment (measurement). Describe comparability of assessment methods if there is more than one group | 5,6                |
| Bias                         | 9      | Describe any efforts to address potential sources of bias                                                                                                                            | 6,11               |
| Study size                   | 10     | Explain how the study size was arrived at                                                                                                                                            | NA                 |
| Quantitative variables       | 11     | Explain how quantitative variables were handled in the analyses. If applicable, describe which groupings were chosen and why                                                         | 6,7                |
| Statistical methods          | 12     | (a) Describe all statistical methods, including those used to control for confounding                                                                                                | 7                  |
|                              |        | (b) Describe any methods used to examine subgroups and interactions                                                                                                                  | 7                  |
|                              |        | (c) Explain how missing data were addressed                                                                                                                                          | NA                 |
|                              |        | (d) If applicable, describe analytical methods taking account of sampling strategy                                                                                                   | NA                 |
|                              |        | (e) Describe any sensitivity analyses                                                                                                                                                | NA                 |
| <b>Results</b>               |        |                                                                                                                                                                                      |                    |

|                          |     |                                                                                                                                                                                                              |         |
|--------------------------|-----|--------------------------------------------------------------------------------------------------------------------------------------------------------------------------------------------------------------|---------|
| Participants             | 13* | (a) Report numbers of individuals at each stage of study—eg numbers potentially eligible, examined for eligibility, confirmed eligible, included in the study, completing follow-up, and analysed            | 7,8     |
|                          |     | (b) Give reasons for non-participation at each stage                                                                                                                                                         | 7       |
|                          |     | (c) Consider use of a flow diagram                                                                                                                                                                           | 7       |
| Descriptive data         | 14* | (a) Give characteristics of study participants (eg demographic, clinical, social) and information on exposures and potential confounders                                                                     | 7,8     |
|                          |     | (b) Indicate number of participants with missing data for each variable of interest                                                                                                                          | NA      |
| Outcome data             | 15* | Report numbers of outcome events or summary measures                                                                                                                                                         | 8       |
| Main results             | 16  | (a) Give unadjusted estimates and, if applicable, confounder-adjusted estimates and their precision (eg, 95% confidence interval). Make clear which confounders were adjusted for and why they were included | 7,8     |
|                          |     | (b) Report category boundaries when continuous variables were categorized                                                                                                                                    | 7       |
|                          |     | (c) If relevant, consider translating estimates of relative risk into absolute risk for a meaningful time period                                                                                             | NA      |
| Other analyses           | 17  | Report other analyses done—eg analyses of subgroups and interactions, and sensitivity analyses                                                                                                               | 8       |
| <b>Discussion</b>        |     |                                                                                                                                                                                                              |         |
| Key results              | 18  | Summarise key results with reference to study objectives                                                                                                                                                     | 9       |
| Limitations              | 19  | Discuss limitations of the study, taking into account sources of potential bias or imprecision. Discuss both direction and magnitude of any potential bias                                                   | 11      |
| Interpretation           | 20  | Give a cautious overall interpretation of results considering objectives, limitations, multiplicity of analyses, results from similar studies, and other relevant evidence                                   | 9,10,11 |
| Generalisability         | 21  | Discuss the generalisability (external validity) of the study results                                                                                                                                        | 11      |
| <b>Other information</b> |     |                                                                                                                                                                                                              |         |
| Funding                  | 22  | Give the source of funding and the role of the funders for the present study and, if applicable, for the original study on which the present article is based                                                | 12      |

\*Give information separately for cases and controls in case-control studies and, if applicable, for exposed and unexposed groups in cohort and cross-sectional studies.

**Note:** An Explanation and Elaboration article discusses each checklist item and gives methodological background and published examples of transparent reporting. The STROBE checklist is best used in conjunction with this article (freely available on the Web sites of PLoS Medicine at <http://www.plosmedicine.org/>, Annals of Internal Medicine at <http://www.annals.org/>, and Epidemiology at <http://www.epidem.com/>). Information on the STROBE Initiative is available at [www.strobe-statement.org](http://www.strobe-statement.org).

# BMJ Open

## The relationship between right-to-left shunt and migraine in patients with epilepsy: a single-centre, cross-sectional study

|                                 |                                                                                                                                                                                                                                                                                                                                                                                                                                                                                                                                                                                                                                                                                                                                                                                                                                                                                                                                                             |
|---------------------------------|-------------------------------------------------------------------------------------------------------------------------------------------------------------------------------------------------------------------------------------------------------------------------------------------------------------------------------------------------------------------------------------------------------------------------------------------------------------------------------------------------------------------------------------------------------------------------------------------------------------------------------------------------------------------------------------------------------------------------------------------------------------------------------------------------------------------------------------------------------------------------------------------------------------------------------------------------------------|
| Journal:                        | <i>BMJ Open</i>                                                                                                                                                                                                                                                                                                                                                                                                                                                                                                                                                                                                                                                                                                                                                                                                                                                                                                                                             |
| Manuscript ID                   | bmjopen-2018-024144.R1                                                                                                                                                                                                                                                                                                                                                                                                                                                                                                                                                                                                                                                                                                                                                                                                                                                                                                                                      |
| Article Type:                   | Research                                                                                                                                                                                                                                                                                                                                                                                                                                                                                                                                                                                                                                                                                                                                                                                                                                                                                                                                                    |
| Date Submitted by the Author:   | 07-Jul-2018                                                                                                                                                                                                                                                                                                                                                                                                                                                                                                                                                                                                                                                                                                                                                                                                                                                                                                                                                 |
| Complete List of Authors:       | Zhang, Lin; Sichuan University West China Hospital, Department of Neurology<br>Zhu, Xi; Sichuan University West China Hospital, Department of Neurology<br>Qiu, XIangmiao; Sichuan University West China Hospital, Department of Neurology<br>Li, Yajiao; Sichuan University West China Hospital, Department of Cardiology<br>Chen, Yucheng; Sichuan University West China Hospital, Department of Cardiology<br>Wang, Hui; Sichuan University West China Hospital, Department of Cardiology<br>He, Shixu; Sichuan University West China Hospital, Department of Neurology<br>Lai, Wanlin; Sichuan University West China Hospital, Department of Neurology<br>Peng, Anjiao; Sichuan University West China Hospital, Department of Neurology<br>Ning, Mingming; Cardio-Neurology Clinic, Massachusetts General Hospital, Harvard Medical School, Department of Neurology<br>Chen, Lei; Sichuan University West China Medical Center, Department of Neurology |
| <b>Primary Subject Heading</b>: | Neurology                                                                                                                                                                                                                                                                                                                                                                                                                                                                                                                                                                                                                                                                                                                                                                                                                                                                                                                                                   |
| Secondary Subject Heading:      | Epidemiology                                                                                                                                                                                                                                                                                                                                                                                                                                                                                                                                                                                                                                                                                                                                                                                                                                                                                                                                                |
| Keywords:                       | Epilepsy < NEUROLOGY, Migraine < NEUROLOGY, Right-to-left shunt                                                                                                                                                                                                                                                                                                                                                                                                                                                                                                                                                                                                                                                                                                                                                                                                                                                                                             |
|                                 |                                                                                                                                                                                                                                                                                                                                                                                                                                                                                                                                                                                                                                                                                                                                                                                                                                                                                                                                                             |

SCHOLARONE™  
Manuscripts

1  
2  
3 **The relationship between right-to-left shunt and migraine in patients with**  
4  
5 **epilepsy: a single-centre, cross-sectional study**  
6  
7

8  
9 Lin Zhang,<sup>1</sup> Xi Zhu,<sup>1</sup> Xiangmiao Qiu,<sup>1</sup> Yajiao Li,<sup>2</sup> Yucheng Chen,<sup>2</sup> Hui Wang,<sup>2</sup> Shixu  
10  
11 He,<sup>1</sup> Wanlin Lai,<sup>1</sup> Anjiao Peng,<sup>1</sup> Mingming Ning,<sup>3</sup> Lei Chen<sup>1</sup>  
12  
13

14  
15 <sup>1</sup>Department of Neurology, West China Hospital, Sichuan University, Chengdu, China  
16

17  
18 <sup>2</sup>Department of Cardiology, West China Hospital, Sichuan University, Chengdu,  
19  
20 China  
21

22  
23 <sup>3</sup>Department of Neurology, Cardio-Neurology Clinic, Massachusetts General Hospital,  
24  
25 Harvard Medical School, Boston, USA  
26

27  
28  
29 Email for each author: Lin Zhang ([zhanglinneur@163.com](mailto:zhanglinneur@163.com)), Xi Zhu  
30  
31 ([zhu61900@163.com](mailto:zhu61900@163.com)), Xiangmiao Qiu ([qiuxmiao@126.com](mailto:qiuxmiao@126.com)), Yajiao Li  
32  
33 ([liyajiao800@163.com](mailto:liyajiao800@163.com)), Yucheng Chen ([chenyucheng2003@126.com](mailto:chenyucheng2003@126.com)), Hui Wang  
34  
35 ([dashu1985723@163.com](mailto:dashu1985723@163.com)), Shixu He ([274464077@qq.com](mailto:274464077@qq.com)), Wanlin Lai  
36  
37 ([laiwl93@163.com](mailto:laiwl93@163.com)), Anjiao Peng ([peng\\_neurology@163.com](mailto:peng_neurology@163.com)), Mingming Ning  
38  
39 ([Ning@hms.harvard.edu](mailto:Ning@hms.harvard.edu)), Lei Chen ([leilei\\_25@126.com](mailto:leilei_25@126.com))  
40  
41  
42  
43

44 Key words: right-to-left shunt; epilepsy; migraine  
45

46 Number of words (main text): 2656  
47  
48  
49  
50  
51  
52  
53  
54  
55  
56  
57

58 Corresponding to: Prof Lei Chen, Department of Neurology, West China Hospital, Sichuan University, No. 37  
59 Guoxue Road, Chengdu, Sichuan Province, 610041, China. Tel: 13258178634. E-mail: [leilei\\_25@126.com](mailto:leilei_25@126.com)  
60

## ABSTRACT

**Objectives** To investigate the relationship between right-to-left shunt and migraine to account for the unexplained high prevalence of migraine in patients with epilepsy.

**Design** This is a cross-sectional study. The diagnosis and interview process of patients with migraine was based on the International Classification of Headache Disorders-3 beta in patients with epilepsy. Participants underwent transthoracic echocardiography (TTE) with contrast medium to identify right-to-left shunt. The highest number of microbubbles were recorded in the left atrium before the complete microbubble outflow of the right atrium. A moderate-to-large shunt was defined as the presence of 10 or more microbubbles.

**Setting** Single-centre, 2015-2017.

**Participants** Patients with epilepsy.

**Primary and secondary outcome measures** The primary outcome measures were the prevalence of migraine; the prevalence of right-to-left shunt in patients with migraine and those without migraine; and the prevalence of migraine in different degrees of shunting.

**Results** Three hundred thirty-nine participants with epilepsy who completed TTE were included in the analysis. The overall prevalence of migraine was 23.0%. One third of the migraineurs had mild right-to-left shunt and one fifth of the migraineurs had moderate-to-large right-to-left shunt. Patients with mild shunt did not have a higher prevalence of migraine than those without shunt (26.3% vs. 18.1%,  $p = 0.102$ ); however, a higher prevalence of migraine was found in patients with moderate-to-large shunt (39.0% vs. 18.1%, odds ratio = 2.90, 95% confidence interval = 1.41 to 5.98,  $p = 0.003$ ). Patients with migraine and patients without migraine had similar prevalence of mild shunt; however, patients with migraine had more

1  
2 moderate-to-large shunt (20.5% vs. 9.6%,  $p=0.002$ ). Right-to-left shunt and female  
3  
4 were factors predicting migraine prevalence.  
5  
6

7 **Conclusions** One fifth of migraineurs were correlated with moderate-to-large  
8  
9 right-to-left shunt, which could be an underlying cause of migraine in epilepsy.  
10  
11

### 12 13 **Strengths and limitations of this study**

- 14  
15 ▶ Cohort study with data from a large number of patients with epilepsy.
- 16  
17 ▶ We first studied the relationship between the degree of shunt and migraine in  
18  
19 patients with epilepsy.
- 20  
21 ▶ Transthoracic echocardiography with contrast medium was used as a tool to detect  
22  
23 right-to-left shunt but not transoesophageal echocardiography.  
24  
25  
26  
27  
28  
29  
30  
31  
32  
33  
34  
35  
36  
37  
38  
39  
40  
41  
42  
43  
44  
45  
46  
47  
48  
49  
50  
51  
52  
53  
54  
55  
56  
57  
58  
59  
60



## INTRODUCTION

The comorbidity of migraine is common in patients with epilepsy. The lifetime occurrence of migraine was as high as 33.6% in patients with epilepsy, representing an overall 52% increase relative to people without epilepsy.<sup>1 2</sup> Comorbid migraine may have an unfavourable effect on the prognosis of epilepsy in children and adults.<sup>3 4</sup> Evidence of genetics and animal experiments have suggested similar pathophysiological mechanisms between migraine and familial epilepsy, such as genetic variants and abnormal neuronal excitability.<sup>5-9</sup> Despite these findings, the mechanisms underlying migraine in patients with epilepsy are still controversial.

In the past 2 decades, right-to-left shunt, usually due to patent foramen ovale (PFO) and pulmonary arteriovenous shunt, have been found to be associated with migraine. A three-fold higher migraine with aura was observed in patients with right-to-left shunt compared to people without right-to-left shunt.<sup>10</sup> There are clinical trials showing that treatment for right-to-left shunt can significantly reduce headache days although the responder rate defined as a 50% reduction in migraine attacks is not different from baseline.<sup>11-14</sup> In addition, the meta-analyses showed that a complete resolution of migraine after treatment for right-to-left shunt occurred in 54% of migraine-with-aura cases and in 39% of migraine-without-aura cases.<sup>15 16</sup> Therefore, right-to-left shunt may be a fundamental cause of migraine. One of the possible mechanisms between the 2 conditions is that vasoactive chemicals triggering migraine bypass the pulmonary filter.<sup>5</sup> Right-to-left shunt may carry microemboli into the carotid circulation. Animal experiments showed that microemboli can trigger the aura phenomenon by inducing cortical spreading depression (CSD).<sup>7</sup>

Similarly, right-to-left shunt may also induce migraine by vasoactive chemicals and microemboli in patients with epilepsy. Therefore, our main aim was to investigate

1  
2  
3 the relationship between right-to-left shunt and migraine to account for the  
4 unexplained high prevalence of migraine in epilepsy. We also investigated other  
5 migraine predictive factors, for example, sex, age, familial epilepsy, duration of  
6 epilepsy and antiepileptic drugs (AEDs).  
7  
8  
9  
10

## 11 12 13 **METHODS**

### 14 **Study design and patients**

15  
16 This is a cross-sectional study. Study populations were consecutively recruited  
17 between June 2015 and December 2017 from the Department of Neurology, West  
18 China Hospital, Sichuan University, China. Participants or legal guardians signed  
19 informed consent. The inclusion criteria were as follows: (1) patients with epilepsy or  
20 possible epilepsy (patients with possible epilepsy will be followed to establish the  
21 diagnosis of epilepsy); and (2) the clinical history and medical records of epilepsy can  
22 be obtained. The exclusion criteria were as follows: (1) age <3 years; (2) inaccurate  
23 communication because of language problems; (3) patients with one seizure (because  
24 high recurrence risk factors are controversial) and provoked seizures; (4) the  
25 diagnosis of epilepsy was still undetermined when we performed the data analysis; (5)  
26 the clinical history of epilepsy including onset age of seizure, AEDs, familial history  
27 of epilepsy, seizure frequency in the last year, and types of seizure were not recorded;  
28 (6) history of heart disease except right-to-left shunt; (7) right-to-left shunt confirmed  
29 by transthoracic echocardiography (TTE) at another hospital (because there may be  
30 differences between sonographers); (8) informed consent not signed; and (9) patients  
31 did not complete the interview process for the diagnosis of migraine.  
32  
33  
34  
35  
36  
37  
38  
39  
40  
41  
42  
43  
44  
45  
46  
47  
48  
49  
50  
51  
52  
53  
54

### 55 **Definitions and collection of data**

56  
57  
58  
59  
60

1  
2  
3 A definitive diagnosis and classification of epilepsy met the criteria proposed by the  
4 International League Against Epilepsy (ILAE) based on the clinical history, seizure  
5 semiology, electroencephalography (EEG), and magnetic resonance imaging (MRI)  
6 findings.<sup>17</sup> For each patient, age, symptoms of seizure, onset age of seizure, AEDs,  
7 education status, seizure onset with visual symptoms, history of febrile seizure,  
8 seizure frequency in the last year, familial history of epilepsy, and types of seizure  
9 (focal onset, focal to bilateral tonic-clonic seizures, or generalized onset) were  
10 recorded.  
11  
12

13  
14  
15 The diagnosis and interview process for patients with migraine were based on the  
16 International Classification of Headache Disorders (ICHD-3 beta).<sup>18</sup> The number of  
17 migraine attacks, estimated duration of migraine, location, quality, intensity (visual  
18 analogue scale, 0-10), and aura were recorded. Patients would not be classified as  
19 having migraine if only postictal and ictal migrainous headache occurred because  
20 ICHD-3 beta does not have related criteria. Every patient was diagnosed by 2  
21 neurologists separately. If the diagnosis of epilepsy and migraine was inconsistent, a  
22 third senior neurologist was asked to discuss the case further.  
23  
24  
25  
26  
27  
28  
29  
30  
31  
32  
33  
34  
35  
36

37 For children, their parents (or the children themselves if they were old enough)  
38 were asked to give specific information about epilepsy and migraine. Medical records  
39 and seizure diaries during the last 12 months were reviewed to obtain information  
40 regarding the history of epilepsy and migraine, EEG, and MRI.  
41  
42  
43  
44  
45  
46  
47

### 48 **Transthoracic Echocardiography**

49  
50 Participants underwent transthoracic echocardiography (TTE) with contrast medium  
51 and 1-5 MHz or 3-8MHz multiplane transducers in Philips IE33 to identify  
52 right-to-left shunt; this was performed by 2 experienced sonographers who also  
53  
54  
55  
56  
57  
58  
59  
60

1  
2  
3 analysed the videotapes together. Patients with other cardiac diseases (e.g., valvular  
4 heart disease and cardiomyopathy) found by TTE were excluded. A microbubble  
5 bolus of agitated solution of 9 mL saline and 1 mL air was injected into one side of  
6 the patients' antecubital veins for increased sensitivity.<sup>19 20</sup> Patients were assessed for  
7 right-to-left shunt at rest and during the Valsalva manoeuvre and coughing. The  
8 highest number of microbubbles were recorded in the left atrium before the complete  
9 microbubble outflow of the right atrium. If 3 or more microbubbles appeared, a  
10 right-to-left shunt was diagnosed. The degree of shunting was defined as grade 0 if 0  
11 to 2 microbubbles occurred, grade 1 (mild) if 3 to 9 microbubbles occurred, grade 2  
12 (moderate) if 10 to 30 microbubbles occurred and grade 3 (large) if more than 30  
13 microbubbles occurred.<sup>21</sup>

### 24 25 26 27 28 **Data analysis**

29 Data were collected using the same standard forms in Microsoft Excel (version 2013).  
30 Continuous variables were compared by analysis of variance (ANOVA). Categorical  
31 variables were compared using the chi-square test or Fisher's exact test, as appropriate.  
32 Bonferroni correction was used if necessary. Logistic regression analyses were used to  
33 determine whether some variables were migraine-predicting factors. For all statistical  
34 tests,  $p < 0.05$  was determined to be statistically significant. Statistics were performed  
35 using the SPSS statistical package (version 21.0).  
36  
37  
38  
39  
40  
41  
42  
43  
44  
45  
46  
47

### 48 **Patient and public involvement**

49 The development of the research question and outcome measures were informed by  
50 published literature on PFO and migraine. Patients' priorities, experience and  
51 preferences were not involved in designing the study. Patients who agreed to enrol to  
52  
53  
54  
55  
56  
57  
58  
59  
60

1  
2  
3 the study received TTE. The recruitment process was mentioned in the Study Design  
4 and Patients section. Two authors (Lin Zhang and Xi Zhu) disseminated the results to  
5  
6  
7 the study participants by interviews.  
8  
9

## 10 11 **RESULTS**

12  
13 We carefully interviewed 532 patients with seizure (s) or (and) their parents. One  
14  
15 hundred sixty-one patients were excluded. The reasons for exclusion are shown in  
16  
17 figure 1. Three hundred thirty-nine participants with epilepsy who completed the  
18  
19 interview process of migraine and TTE were included in the analysis. The details of  
20  
21 migraine features according to the ICHD-3 beta criteria are shown in Supplementary  
22  
23 file 1. The overall prevalence of migraine was 23.0% (table 1). A greater percentage  
24  
25 of females had migraines than males (28.8% vs. 17.2%,  $p = 0.022$ ). Patients > 16  
26  
27 years seemed to have a higher prevalence of migraine than those  $\leq 16$  years of age  
28  
29 (25.7% vs. 11.0%,  $p = 0.039$ ). If the duration of epilepsy was more than 10 years,  
30  
31 patients were more likely to have migraines (34.6% vs. 17.9%,  $p = 0.001$ ). Patients  
32  
33 with polytherapy may have more migraines (28.0% vs. 19.0%,  $p = 0.052$ ). Patients  
34  
35 with first-degree and second-degree relatives with epilepsy, as well as a history of  
36  
37 febrile seizures, may not have more migraines. Patients who have visual symptoms at  
38  
39 the onset of seizures did not have more migraines than those without visual symptoms  
40  
41 (data not shown).  
42  
43  
44  
45

46 One third of migraineurs have mild right-to-left shunt (table 1 and table 2). Patients  
47  
48 with mild right-to-left shunt did not have a higher prevalence of migraine than those  
49  
50 without right-to-left shunt (26.3% vs 18.1%, odds ratio = 1.61, 95% confidence  
51  
52 interval = 0.91 to 2.87,  $p = 0.102$ ). In our cohort, 33.3% (26 of 78) of patients with  
53  
54 epilepsy and with migraine and 28.0% (73 of 261) of patients with epilepsy and  
55  
56  
57  
58  
59  
60

1  
2  
3 without migraine had mild right-to-left shunt ( $p = 0.361$ ).

4  
5 One fifth of migraineurs have moderate-to-large right-to-left shunt (table 1 and  
6  
7 table 2). Patients with moderate-to-large right-to-left shunt had a higher prevalence of  
8  
9 migraine than those without right-to-left shunt (39.0% vs. 18.1%, odds ratio = 2.90,  
10  
11 95% confidence interval = 1.41 to 5.98,  $p = 0.003$ ). Twenty-one percent (16 of 78) of  
12  
13 patients with epilepsy and with migraine had moderate-to-large right-to-left shunt;  
14  
15 whereas only 10% (25 of 261) of patients with epilepsy and without migraine had  
16  
17 moderate-to-large right-to-left shunt (odds ratio = 2.44, 95% confidence interval =  
18  
19 1.23 to 4.84,  $p=0.002$ ). After controlling for potential confounders, there are  
20  
21 significant differences of migraine prevalence between the groups with right-to-left  
22  
23 shunt grade 2-3 versus the group with right-to-left shunt grade 0 (table 2). Therefore,  
24  
25 moderate-to-large right-to-left shunt but not mild right-to-left shunt was associated  
26  
27 with migraine in patients with epilepsy.  
28  
29

30  
31 We used a logistic regression analysis to identify the possible factors predicting  
32  
33 migraine prevalence, such as gender, duration of epilepsy, current age, right-to-left  
34  
35 shunt and number of antiepileptic drugs (table 3). Right-to-left shunt and female were  
36  
37 factors predicting migraine prevalence. Although patients with duration of  
38  
39 epilepsy >10 years and older age have a higher migraine prevalence (table 1), the  
40  
41 logistic regression analysis showed no significant statistical difference.  
42  
43

44 PFO closure were performed in 7 patients. Four patients were followed for 6  
45  
46 months. We found that PFO closure fully controlled migraine in 2 of 4 cases. Before  
47  
48 PFO closure, the two patients have more than 11 migraine attacks in the last year.  
49  
50 More interesting, the frequency of seizures in 3 patients with migraine after PFO  
51  
52 closure decreased significantly.  
53  
54  
55  
56  
57  
58  
59  
60

## DISCUSSION

This is the first study to evaluate the relationship between migraine and right-to-left shunt in a large number of patients with epilepsy. Our main findings were as follows:

1) one third of the migraineurs have mild right-to-left shunt and one fifth of the migraineurs have moderate-to-large right-to-left shunt; 2) patients with mild right-to-left shunt did not have a higher prevalence of migraine than those without right-to-left shunt; 3) moderate-to-large right-to-left shunt was associated with migraine in patients with epilepsy and 4) right-to-left shunt and female were factors predicting migraine prevalence in patients with epilepsy.

Migraine in patients without epilepsy has been proved to be associated with CSD and activation of the trigeminovascular system and its constituent neuropeptides.<sup>22</sup> In addition, recent studies also suggested the cortical excitatory/inhibitory imbalance due to neuronal and glial ion channels renders patients more vulnerable to an headache attack.<sup>22</sup> Migraine in patients with epilepsy is not only associated with the aforementioned mechanisms, but also is usually considered to be associated with abnormal neuronal excitability induced by genetic variants.<sup>5-9</sup> However, the high prevalence of migraine in patients with epilepsy cannot be fully explained by genetic variants. In the past 2 decades, right-to-left shunt have been found to be associated with migraine in patients without epilepsy. Our major hypothesis was that right-to-left shunt may also be one of the pathophysiological mechanisms of migraine in patients with epilepsy. The results showed that mild right-to-left shunt was not associated with migraine in patients with epilepsy. Almost one fifth of migraine were correlated with moderate-to-large right-to-left shunt, which could be an underlying cause of migraine in epilepsy. The mechanisms of the relationship between moderate-to-large right-to-left shunt and migraine remains speculative. A previous study showed that

1  
2  
3 larger right-to-left shunt tend to trigger migraine attacks because of the increased  
4 extent of the shunt.<sup>23</sup> Larger shunt allow harmful circulatory factors, such as  
5 vasoactive substances and microemboli which are eliminated by lung, to bypass the  
6 pulmonary filter and travel directly from the venous to the cerebral artery.  
7 Right-to-left shunt and higher rates of Doppler-detected cerebral microemboli have  
8 been reported to be associated.<sup>24</sup> In an animal experiment, air microemboli are able to  
9 trigger CSD and migraine aura often with transient microvascular occlusion that is  
10 insufficient to cause a permanent ischemic lesion.<sup>7</sup> In humans, diagnostic microbubble  
11 injection also induced attacks of migraine with aura.<sup>25</sup> Therefore, microemboli may be  
12 a key role linking CSD, migraine, and moderate-to-large shunt.  
13  
14  
15  
16  
17  
18  
19  
20  
21  
22  
23

24 Interestingly, CSD increases neuronal excitability and triggers ictiform activity in  
25 neuronal tissues with partial impairment of inhibitory.<sup>9</sup> CSD also triggers migraine  
26 headache by activating neuronal Panx1 channels, which contributes to neuronal  
27 hyperactivity in seizures.<sup>26,27</sup> These findings may explain why migraine may have an  
28 unfavourable effect on the prognosis of epilepsy.<sup>3,4</sup> Therefore, moderate-to-large  
29 right-to-left shunt may not only be an underlying cause of migraine but also an  
30 adverse prognostic factor in patients with epilepsy. Whether moderate-to-large  
31 right-to-left shunt is an adverse prognostic factors in epilepsy should also be  
32 investigated.  
33  
34  
35  
36  
37  
38  
39  
40  
41  
42  
43

44 The effect of PFO closure for migraine treatment still remains controversial.  
45 Randomised controlled trials (RCTs) looking at the effect of PFO closure on migraine  
46 were initially conducted. There are clinical trials showing that treatment for  
47 right-to-left shunt did not increase responder rate defined as 50% reduction in  
48 migraine attacks; however, it significantly reduced headache days.<sup>11-14</sup> Similarly to the  
49 stroke trials, they had initial negative RCTs. With better patient selection and longer  
50  
51  
52  
53  
54  
55  
56  
57  
58  
59  
60



1  
2  
3 follow-up, subsequent trials may show more cessation of migraine headache.<sup>28</sup> In our  
4 cohort, we found that PFO closure fully controlled migraine in 2 of 4 cases. More  
5 interesting, the frequency of seizures in 3 patients with migraine after surgery  
6 decreased significantly. Although these cases need to be explained with caution, it is  
7 worth investigating in the future whether PFO closure improve migraine attacks and  
8 seizure outcomes. In addition, given the subjective nature of migraines and their  
9 vulnerability to bias and the placebo effect, perhaps a large, well-designed sham  
10 controlled trial with modern devices is required. If treatment for right-to-left shunt  
11 have been shown to be definitely effective, right-to-left shunt should be screened in  
12 patients with epilepsy and with migraine.  
13  
14  
15  
16  
17  
18  
19  
20  
21  
22  
23

24 This study has some limitations. First, transoesophageal echocardiography (TEE) is  
25 a gold standard diagnostic tool with a sensitivity and specificity of 80% to 100% for  
26 the detection of a right-to-left shunt.<sup>19 20</sup> The contrast TTE used by us has a lower  
27 sensitivity than TEE.<sup>19</sup> However, harmonic imaging improves sensitivity for the  
28 detection of right-to-left shunt, ranging from 66% to 100%.<sup>19 20 29 30</sup> In addition, TTE  
29 is not inferior to TEE in the assessment of large shunt because TEE may miss large  
30 shunt detected by TTE.<sup>30</sup> In our study, moderate-to-large right-to-left shunt are more  
31 likely to be associated with migraine; therefore, TTE may not be an inferior choice to  
32 TEE. Second, the population may be biased because a few patients did not complete  
33 TTE. However, there were no differences in demographic characteristics between  
34 patients who did or did not refuse TTE and the conclusions of our study should not be  
35 affected. Third, only Chinese people were recruited, and this limits the  
36 generalizability of results.  
37  
38  
39  
40  
41  
42  
43  
44  
45  
46  
47  
48  
49  
50  
51  
52  
53  
54

## 55 CONCLUSIONS

56  
57  
58  
59  
60

1  
2  
3 Moderate-to-large right-to-left shunt but not mild right-to-left shunt were associated  
4 with migraine. On the basis of these results, patients with epilepsy and with migraine  
5 should be screened for a right-to-left shunt if treatment for a right-to-left shunt has  
6 been shown to be effective in migraine. Whether moderate-to-large right-to-left shunt  
7 is an adverse prognostic factor in epilepsy should be also investigated.  
8  
9  
10  
11  
12

13  
14  
15  
16 **Acknowledgements** No patient advisers were involved in the study. We thank Dr. Qi  
17 Si for her help.  
18  
19  
20  
21

22 **Contributors** Lei Chen and Mingming Ning conceived and designed the work. Lin  
23 Zhang and Xi Zhu were involved in data collection, data analysis and interpretation.  
24 Lin Zhang drafted the manuscript. Lei Chen involved in critical revision of the article  
25 and final approval of the version to be published. Xiangmiao Qiu, Xiangmiao Qiu,  
26 Shixu He, Anjiao Peng, Wanlin Lai, Yajiao Li, Yucheng Chen, and Hui Wang were  
27 involved in the data collection and final approval of the version to be published. All  
28 authors have agreed to be accountable for all aspects of the work.  
29  
30  
31  
32  
33  
34  
35  
36  
37  
38

39 **Funding** Funding for this study was provided by China Association Against Epilepsy  
40 (No.2016005).  
41  
42  
43  
44  
45

46 **Competing interests** None declared.  
47  
48  
49

50 **Patient consent** Obtained.  
51  
52  
53

54 **Ethics approval** The protocol was approved by the Ethics Committee of the West  
55  
56  
57  
58  
59  
60

1  
2  
3 China Hospital of Sichuan University.  
4  
5  
6

7 **Data sharing statement** No additional data available.  
8  
9

10  
11 **REFERENCES**  
12  
13

- 14 1. Keezer MR, Bauer PR, Ferrari MD, *et al*. The comorbid relationship between  
15 migraine and epilepsy: a systematic review and meta-analysis. *Eur J Neurol*  
16 2015;22:1038-47.  
17  
18 2. Le H, Tfelt-Hansen P, Russell MB, *et al*. Co-morbidity of migraine with  
19 somatic disease in a large population-based study. *Cephalalgia* 2011;31:43-64.  
20  
21 3. Dragoumi P, Tzetzis O, Vargiami E, *et al*. Clinical course and seizure outcome  
22 of idiopathic childhood epilepsy: determinants of early and long-term  
23 prognosis. *BMC Neurol* 2013;13:206.  
24  
25 4. Velioglu SK, Boz C, Ozmenoglu M. The impact of migraine on epilepsy: a  
26 prospective prognosis study. *Cephalalgia* 2005;25:528-35.  
27  
28 5. Finocchi C, Del Sette M. Migraine with aura and patent foramen ovale: myth  
29 or reality? *Neurol Sci* 2015;36 Suppl 1:61-6.  
30  
31 6. Ludvigsson P, Hesdorffer D, Olafsson E, *et al*. Migraine with aura is a risk  
32 factor for unprovoked seizures in children. *Ann Neurol* 2006;59:210-3.  
33  
34 7. Nozari A, Dilekoz E, Sukhotinsky I, *et al*. Microemboli may link spreading  
35 depression, migraine aura, and patent foramen ovale. *Ann Neurol*  
36 2010;67:221-9.  
37  
38 8. Winawer MR, Connors R. Evidence for a shared genetic susceptibility to  
39  
40  
41  
42  
43  
44  
45  
46  
47  
48  
49  
50  
51  
52  
53  
54  
55  
56  
57  
58  
59  
60

- migraine and epilepsy. *Epilepsia* 2013;54:288-95.
9. Eickhoff M, Kovac S, Shahabi P, *et al.* Spreading depression triggers ictiform activity in partially disinhibited neuronal tissues. *Exp Neurol* 2014;253:1-15.
  10. Wammes-van der Heijden EA, Tijssen CC, Egberts AC. Right-to-left shunt and migraine: the strength of the relationship. *Cephalalgia* 2006;26:208-13.
  11. Xing YQ, Guo YZ, Gao YS, *et al.* Effectiveness and Safety of Transcatheter Patent Foramen Ovale Closure for Migraine (EASTFORM) Trial. *Sci Rep* 2016;6:39081.
  12. Tobis JM, Charles A, Silberstein SD, *et al.* Percutaneous Closure of Patent Foramen Ovale in Patients With Migraine: The PREMIUM Trial. *J Am Coll Cardiol* 2017;70:2766-74.
  13. Dowson A, Mullen MJ, Peatfield R, *et al.* Migraine Intervention With STARFlex Technology (MIST) trial: a prospective, multicenter, double-blind, sham-controlled trial to evaluate the effectiveness of patent foramen ovale closure with STARFlex septal repair implant to resolve refractory migraine headache. *Circulation* 2008;117:1397-404.
  14. Mattle HP, Evers S, Hildick-Smith D, *et al.* Percutaneous closure of patent foramen ovale in migraine with aura, a randomized controlled trial. *Eur Heart J* 2016;37:2029-36.
  15. Kanwar SM, Noheria A, DeSimone CV, *et al.* Coincidental Impact of Transcatheter Patent Foramen Ovale Closure on Migraine with and without Aura - A Comprehensive Meta-Analysis. *Clin Trials Regul Sci Cardiol*

- 2016;15:7-13.
16. Shi YJ, Lv J, Han XT, *et al.* Migraine and percutaneous patent foramen ovale closure: a systematic review and meta-analysis. *BMC Cardiovasc Disord* 2017;17:203.
17. Fisher RS, Cross JH, French JA, *et al.* Operational classification of seizure types by the International League Against Epilepsy: Position Paper of the ILAE Commission for Classification and Terminology. *Epilepsia* 2017;58:522-30.
18. Ettl DA. The International Classification of Headache Disorders, 3rd edition (beta version). *Cephalalgia* 2013;33:629-808.
19. Cotter PE, Martin PJ, Belham M. Improved sensitivity of transthoracic contrast echocardiography in the detection of right-to-left shunts. *J Am Soc Echocardiogr* 2010;23:578; author reply 78-9.
20. Ha JW, Shin MS, Kang S, *et al.* Enhanced detection of right-to-left shunt through patent foramen ovale by transthoracic contrast echocardiography using harmonic imaging. *Am J Cardiol* 2001;87:669-71.
21. Mas JL, Arquizan C, Lamy C, *et al.* Recurrent cerebrovascular events associated with patent foramen ovale, atrial septal aneurysm, or both. *N Engl J Med* 2001;345:1740-6.
22. Pietrobon D, Moskowitz MA. Pathophysiology of migraine. *Annu Rev Physiol* 2013;75:365-91.
23. Tembl J, Lago A, Sevilla T, *et al.* Migraine, patent foramen ovale and

- 1  
2  
3 migraine triggers. *J Headache Pain* 2007;8:7-12.  
4  
5  
6 24. Rodriguez RA, Sinclair B, Weatherdon D, *et al.* Patent foramen ovale and  
7  
8 brain microembolization during scoliosis surgery in adolescents. *Spine (Phila*  
9  
10 *Pa 1976)* 2001;26:1719-21.  
11  
12  
13 25. Dinia L, Roccatagliata L, Bonzano L, *et al.* Diffusion MRI during migraine  
14  
15 with aura attack associated with diagnostic microbubbles injection in subjects  
16  
17 with large PFO. *Headache* 2007;47:1455-6.  
18  
19  
20 26. Karatas H, Erdener SE, Gursoy-Ozdemir Y, *et al.* Spreading depression  
21  
22 triggers headache by activating neuronal Panx1 channels. *Science*  
23  
24 2013;339:1092-5.  
25  
26  
27 27. Santiago MF, Veliskova J, Patel NK, *et al.* Targeting pannexin1 improves  
28  
29 seizure outcome. *PLoS One* 2011;6:e25178.  
30  
31  
32 28. Mojadidi MK, Zaman MO, Elgendy IY, *et al.* Cryptogenic Stroke and Patent  
33  
34 Foramen Ovale. *J Am Coll Cardiol* 2018;71:1035-43.  
35  
36  
37 29. Clarke NR, Timperley J, Kelion AD, *et al.* Transthoracic echocardiography  
38  
39 using second harmonic imaging with Valsalva manoeuvre for the detection of  
40  
41 right to left shunts. *Eur J Echocardiogr* 2004;5:176-81.  
42  
43  
44 30. Daniels C, Weytjens C, Cosyns B, *et al.* Second harmonic transthoracic  
45  
46 echocardiography: the new reference screening method for the detection of  
47  
48 patent foramen ovale. *Eur J Echocardiogr* 2004;5:449-52.  
49  
50  
51  
52  
53  
54  
55  
56  
57  
58  
59  
60

**Table 1 Migraine prevalence in different groups**

| Characteristics                    | Sample | Migraine (%) | P values |
|------------------------------------|--------|--------------|----------|
| Gender                             |        |              | 0.022    |
| Male                               | 169    | 29 (17.2)    |          |
| Female                             | 170    | 49 (28.8)    |          |
| Current age, years                 |        |              | 0.039    |
| ≤16                                | 82     | 12 (11.0)    |          |
| >16                                | 257    | 66 (25.7)    |          |
| Duration of epilepsy, years        |        |              | 0.001    |
| ≤10                                | 235    | 42 (17.9)    |          |
| >10                                | 104    | 36 (34.6)    |          |
| Onset age, years                   |        |              | 0.421    |
| ≤16                                | 183    | 39 (21.3)    |          |
| >16                                | 156    | 39 (25.0)    |          |
| Seizure frequency in the last year |        |              | 0.256    |
| 0-12                               | 246    | 56 (22.8)    |          |
| 13-52                              | 33     | 11 (33.3)    |          |
| >52                                | 28     | 7 (25.0)     |          |
| Unknown                            | 32     | 4 (12.5)     |          |
| Number of AEDs                     |        |              | 0.052    |
| < or = 1                           | 189    | 36 (19.0)    |          |
| > or = 2                           | 150    | 42 (28.0)    |          |
| AEDs                               |        |              | 0.299    |
| Topiramate                         | 66     | 20 (30.3)    |          |
| Valproate                          | 126    | 29 (23.0)    |          |

|    |                                     |     |           |       |
|----|-------------------------------------|-----|-----------|-------|
| 1  |                                     |     |           |       |
| 2  |                                     |     |           |       |
| 3  | Levetiracetam                       | 94  | 26 (27.7) |       |
| 4  |                                     |     |           |       |
| 5  | Oxcarbazepine                       | 94  | 19 (20.2) |       |
| 6  |                                     |     |           |       |
| 7  | Lamotrigine                         | 27  | 2 (7.4)   |       |
| 8  |                                     |     |           |       |
| 9  | Carbamazepine                       | 67  | 19 (28.4) |       |
| 10 |                                     |     |           |       |
| 11 | Phenytoin                           | 20  | 4 (20.0)  |       |
| 12 |                                     |     |           |       |
| 13 | Phenobarbital                       | 12  | 2 (16.7)  |       |
| 14 |                                     |     |           |       |
| 15 | Seizure types                       |     |           | 0.319 |
| 16 |                                     |     |           |       |
| 17 | Focal onset seizure                 | 68  | 10 (14.7) |       |
| 18 |                                     |     |           |       |
| 19 | Generalized onset seizure and focal | 227 | 58 (25.6) |       |
| 20 |                                     |     |           |       |
| 21 | to bilateral tonic-clonic seizures  |     |           |       |
| 22 |                                     |     |           |       |
| 23 | Undetermined                        | 44  | 10 (22.7) |       |
| 24 |                                     |     |           |       |
| 25 | Familial epilepsy                   | 11  | 5 (45.5)  | 0.135 |
| 26 |                                     |     |           |       |
| 27 | First-degree relatives              | 9   | 4 (44.4)  |       |
| 28 |                                     |     |           |       |
| 29 | Second-degree relatives             | 2   | 1 (50.0)  |       |
| 30 |                                     |     |           |       |
| 31 | No familial epilepsy                | 328 | 73 (22.3) |       |
| 32 |                                     |     |           |       |
| 33 | Right-to-left shunt                 |     |           |       |
| 34 |                                     |     |           |       |
| 35 | Grade 1                             | 99  | 26 (26.3) | 0.102 |
| 36 |                                     |     |           |       |
| 37 | Grade 2-3                           | 41  | 16 (39.0) | 0.003 |
| 38 |                                     |     |           |       |
| 39 | Grade 1-3                           | 140 | 42 (29.6) | 0.010 |
| 40 |                                     |     |           |       |
| 41 | Grade 0                             | 199 | 36 (18.1) |       |
| 42 |                                     |     |           |       |
| 43 |                                     |     |           |       |
| 44 |                                     |     |           |       |
| 45 |                                     |     |           |       |

---

AEDs, antiepileptic drugs.



**Table 2 High prevalence of migraine in patients with moderate to large right-to-left shunt**

| Characteristics                                                        | Right-to-left shunt |                |                 | P     |
|------------------------------------------------------------------------|---------------------|----------------|-----------------|-------|
|                                                                        | Grade 2-3 (n=41)    | Grade 1 (n=99) | Grade 0 (n=199) |       |
| Male, n (%)                                                            | 17 (41.5)           | 52 (52.5)      | 100 (50.3)      | 0.413 |
| Age, years                                                             | 26.9 ± 11.7         | 27.6 ± 13.7    | 26.4 ± 13.2     | 0.769 |
| Onset age, years                                                       | 19.3 ± 11.2         | 17.9 ± 12.4    | 17.8 ± 12.3     | 0.779 |
| Duration, years                                                        | 8.1 ± 8.9           | 9.7 ± 9.6      | 8.7 ± 9.1       | 0.580 |
| Familial epilepsy, n (%)                                               | 2                   | 2              | 7               | 0.648 |
| Education, n (%)                                                       |                     |                |                 | 0.772 |
| 0-6, years                                                             | 13 (31.7)           | 24 (24.2)      | 52 (26.1)       |       |
| 7-12, years                                                            | 20 (48.8)           | 47 (47.5)      | 104 (52.3)      |       |
| ≥13, years                                                             | 8 (19.5)            | 28 (28.3)      | 43 (21.6)       |       |
| Seizure types, n (%)                                                   |                     |                |                 | 0.085 |
| Focal onset                                                            | 7 (17.1)            | 22 (22.2)      | 39 (19.6)       |       |
| Generalized onset seizure and focal to bilateral tonic-clonic seizures | 32 (78.0)           | 69 (69.7)      | 126 (63.3)      |       |
| Undetermined                                                           | 2 (4.9)             | 8 (8.1)        | 34 (17.1)       |       |
| Seizure frequency in the last year, n (%)                              |                     |                |                 | 0.284 |
| 0-12                                                                   | 27 (65.9)           | 71 (71.7)      | 148 (71.4)      |       |
| 13-52                                                                  | 3 (7.3)             | 14 (14.1)      | 16 (8.0)        |       |
| >52                                                                    | 6 (14.6)            | 8 (8.1)        | 14 (7.0)        |       |

|                     |           |           |            |                    |
|---------------------|-----------|-----------|------------|--------------------|
| Unknown             | 5 (12.2)  | 6 (6.1)   | 21 (14.1)  |                    |
| Number of used AEDs |           |           |            | 0.139              |
| < or = 1, n (%)     | 25 (61.0) | 47 (47.5) | 117 (58.8) |                    |
| > or = 2, n (%)     | 16 (39.0) | 52 (52.5) | 82 (41.2)  |                    |
| AEDs                |           |           |            | 0.735              |
| Topiramate          | 10        | 21        | 35         |                    |
| Valproate           | 8         | 45        | 74         |                    |
| Levetiracetam       | 15        | 31        | 48         |                    |
| Oxcarbazepine       | 12        | 34        | 48         |                    |
| Lamotrigine         | 4         | 8         | 15         |                    |
| Carbamazepine       | 8         | 28        | 31         |                    |
| Phenytoin           | 1         | 6         | 13         |                    |
| Phenobarbital       | 1         | 4         | 7          |                    |
| Migraine, n (%)     | 16 (39.0) | 26 (26.3) | 36 (18.1)  | 0.010 <sup>a</sup> |

---

The continuous data are presented as mean  $\pm$  standard deviation.

<sup>a</sup> Bonferroni correction show statistical differences in grade 2-3 versus grade 0.

AEDs, antiepileptic drugs.

**Table 3 Logistic regression analysis for migraine predictors**

| Characteristics                   | Odds ratio | 95% confidence interval |        | P     |
|-----------------------------------|------------|-------------------------|--------|-------|
|                                   |            | Lower                   | Upper  |       |
| Male                              | 0.518      | 0.302                   | 0.891  | 0.017 |
| Current age, years                | 0.978      | 0.956                   | 1.001  | 0.057 |
| Right-to-left shunt               | 2.200      | 1.274                   | 3.797  | 0.005 |
| Duration of epilepsy, years       | 0.974      | 0.945                   | 1.004  | 0.085 |
| Familial epilepsy                 | 2.828      | 0.765                   | 10.453 | 0.119 |
| Number of antiepileptic drugs > 1 | 1.354      | 0.784                   | 2.340  | 0.277 |

**Figure legends**

Figure 1. The flow diagram

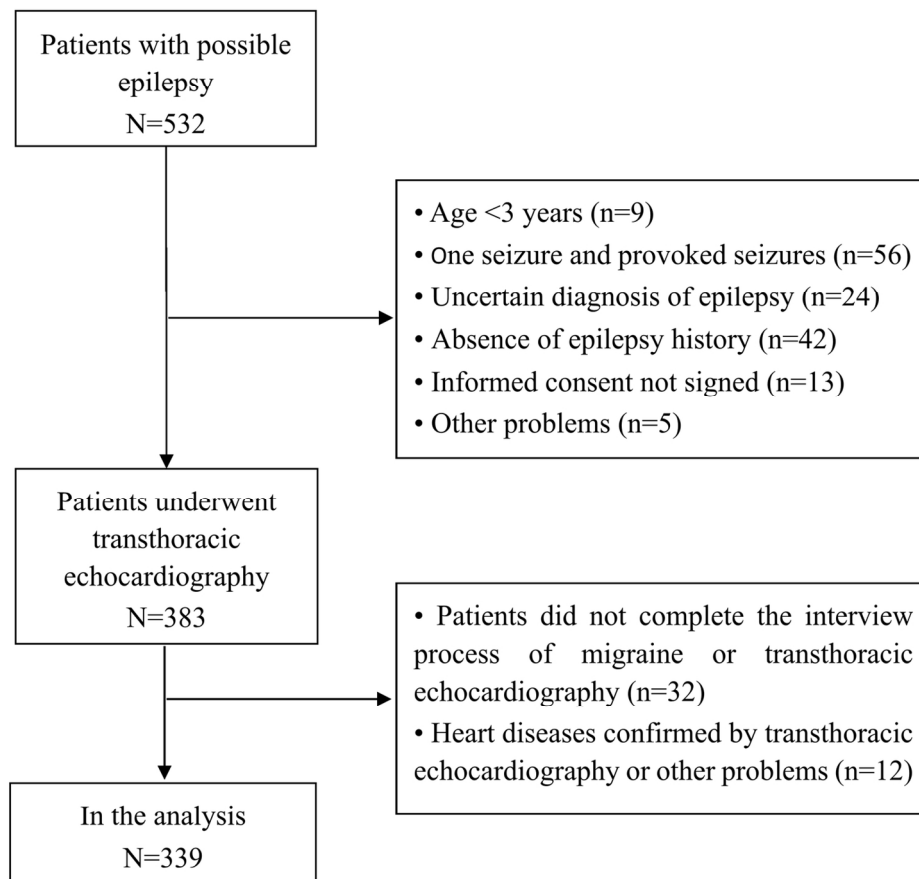

Figure 1. The flow diagram

136x127mm (300 x 300 DPI)

**sTable 1** Characteristics of migraine

| Characteristics                                                               | N=78 |
|-------------------------------------------------------------------------------|------|
| <b>Criteria</b>                                                               |      |
| Duration >2 hours (<18 years) or > 4 hours ( $\geq$ 18 years) <sup>1</sup>    | 78   |
| At least 5 (without aura) attacks or 2 (with aura) attacks <sup>1</sup>       | 78   |
| Headache has at least two of the following four characteristics               | 78   |
| <b>Location</b>                                                               |      |
| Left or Right <sup>1</sup>                                                    | 46   |
| Bilateral                                                                     | 32   |
| <b>Intensity<sup>1,2</sup></b>                                                |      |
| 0-3                                                                           | 17   |
| 4-10 <sup>1</sup>                                                             | 61   |
| Pulsating quality <sup>1</sup>                                                | 53   |
| Aggravation by or causing avoidance of routine physical activity <sup>1</sup> | 51   |
| <b>During headache at least one of the following</b>                          |      |
| Nausea and/or vomiting <sup>1</sup>                                           | 62   |
| Photophobia and Phonophobia <sup>1</sup>                                      | 55   |

<sup>1</sup>Diagnostic criteria of International Classification of Headache Disorders–3 criteria (beta)

<sup>2</sup>Visual analogue scale scores

**STROBE 2007 (v4) Statement—Checklist of items that should be included in reports of *cross-sectional studies***

| Section/Topic                | Item # | Recommendation                                                                                                                                                                       | Reported on page # |
|------------------------------|--------|--------------------------------------------------------------------------------------------------------------------------------------------------------------------------------------|--------------------|
| <b>Title and abstract</b>    | 1      | (a) Indicate the study's design with a commonly used term in the title or the abstract                                                                                               | 1                  |
|                              |        | (b) Provide in the abstract an informative and balanced summary of what was done and what was found                                                                                  | 2                  |
| <b>Introduction</b>          |        |                                                                                                                                                                                      |                    |
| Background/rationale         | 2      | Explain the scientific background and rationale for the investigation being reported                                                                                                 | 3                  |
| Objectives                   | 3      | State specific objectives, including any prespecified hypotheses                                                                                                                     | 4                  |
| <b>Methods</b>               |        |                                                                                                                                                                                      |                    |
| Study design                 | 4      | Present key elements of study design early in the paper                                                                                                                              | 5                  |
| Setting                      | 5      | Describe the setting, locations, and relevant dates, including periods of recruitment, exposure, follow-up, and data collection                                                      | 5                  |
| Participants                 | 6      | (a) Give the eligibility criteria, and the sources and methods of selection of participants                                                                                          | 5                  |
| Variables                    | 7      | Clearly define all outcomes, exposures, predictors, potential confounders, and effect modifiers. Give diagnostic criteria, if applicable                                             | 5,6                |
| Data sources/<br>measurement | 8*     | For each variable of interest, give sources of data and details of methods of assessment (measurement). Describe comparability of assessment methods if there is more than one group | 5,6                |
| Bias                         | 9      | Describe any efforts to address potential sources of bias                                                                                                                            | 6,11               |
| Study size                   | 10     | Explain how the study size was arrived at                                                                                                                                            | NA                 |
| Quantitative variables       | 11     | Explain how quantitative variables were handled in the analyses. If applicable, describe which groupings were chosen and why                                                         | 6,7                |
| Statistical methods          | 12     | (a) Describe all statistical methods, including those used to control for confounding                                                                                                | 7                  |
|                              |        | (b) Describe any methods used to examine subgroups and interactions                                                                                                                  | 7                  |
|                              |        | (c) Explain how missing data were addressed                                                                                                                                          | NA                 |
|                              |        | (d) If applicable, describe analytical methods taking account of sampling strategy                                                                                                   | NA                 |
|                              |        | (e) Describe any sensitivity analyses                                                                                                                                                | NA                 |
| <b>Results</b>               |        |                                                                                                                                                                                      |                    |

|                          |     |                                                                                                                                                                                                              |         |
|--------------------------|-----|--------------------------------------------------------------------------------------------------------------------------------------------------------------------------------------------------------------|---------|
| Participants             | 13* | (a) Report numbers of individuals at each stage of study—eg numbers potentially eligible, examined for eligibility, confirmed eligible, included in the study, completing follow-up, and analysed            | 7,8     |
|                          |     | (b) Give reasons for non-participation at each stage                                                                                                                                                         | 7       |
|                          |     | (c) Consider use of a flow diagram                                                                                                                                                                           | 7       |
| Descriptive data         | 14* | (a) Give characteristics of study participants (eg demographic, clinical, social) and information on exposures and potential confounders                                                                     | 7,8     |
|                          |     | (b) Indicate number of participants with missing data for each variable of interest                                                                                                                          | NA      |
| Outcome data             | 15* | Report numbers of outcome events or summary measures                                                                                                                                                         | 8       |
| Main results             | 16  | (a) Give unadjusted estimates and, if applicable, confounder-adjusted estimates and their precision (eg, 95% confidence interval). Make clear which confounders were adjusted for and why they were included | 7,8     |
|                          |     | (b) Report category boundaries when continuous variables were categorized                                                                                                                                    | 7       |
|                          |     | (c) If relevant, consider translating estimates of relative risk into absolute risk for a meaningful time period                                                                                             | NA      |
| Other analyses           | 17  | Report other analyses done—eg analyses of subgroups and interactions, and sensitivity analyses                                                                                                               | 8       |
| <b>Discussion</b>        |     |                                                                                                                                                                                                              |         |
| Key results              | 18  | Summarise key results with reference to study objectives                                                                                                                                                     | 9       |
| Limitations              | 19  | Discuss limitations of the study, taking into account sources of potential bias or imprecision. Discuss both direction and magnitude of any potential bias                                                   | 11      |
| Interpretation           | 20  | Give a cautious overall interpretation of results considering objectives, limitations, multiplicity of analyses, results from similar studies, and other relevant evidence                                   | 9,10,11 |
| Generalisability         | 21  | Discuss the generalisability (external validity) of the study results                                                                                                                                        | 11      |
| <b>Other information</b> |     |                                                                                                                                                                                                              |         |
| Funding                  | 22  | Give the source of funding and the role of the funders for the present study and, if applicable, for the original study on which the present article is based                                                | 12      |

\*Give information separately for cases and controls in case-control studies and, if applicable, for exposed and unexposed groups in cohort and cross-sectional studies.

**Note:** An Explanation and Elaboration article discusses each checklist item and gives methodological background and published examples of transparent reporting. The STROBE checklist is best used in conjunction with this article (freely available on the Web sites of PLoS Medicine at <http://www.plosmedicine.org/>, Annals of Internal Medicine at <http://www.annals.org/>, and Epidemiology at <http://www.epidem.com/>). Information on the STROBE Initiative is available at [www.strobe-statement.org](http://www.strobe-statement.org).

# BMJ Open

## The relationship between right-to-left shunt and migraine in patients with epilepsy: a single-centre, cross-sectional study in China

|                                 |                                                                                                                                                                                                                                                                                                                                                                                                                                                                                                                                                                                                                                                                                                                                                                                                                                                                                                                                                             |
|---------------------------------|-------------------------------------------------------------------------------------------------------------------------------------------------------------------------------------------------------------------------------------------------------------------------------------------------------------------------------------------------------------------------------------------------------------------------------------------------------------------------------------------------------------------------------------------------------------------------------------------------------------------------------------------------------------------------------------------------------------------------------------------------------------------------------------------------------------------------------------------------------------------------------------------------------------------------------------------------------------|
| Journal:                        | <i>BMJ Open</i>                                                                                                                                                                                                                                                                                                                                                                                                                                                                                                                                                                                                                                                                                                                                                                                                                                                                                                                                             |
| Manuscript ID                   | bmjopen-2018-024144.R2                                                                                                                                                                                                                                                                                                                                                                                                                                                                                                                                                                                                                                                                                                                                                                                                                                                                                                                                      |
| Article Type:                   | Research                                                                                                                                                                                                                                                                                                                                                                                                                                                                                                                                                                                                                                                                                                                                                                                                                                                                                                                                                    |
| Date Submitted by the Author:   | 28-Jul-2018                                                                                                                                                                                                                                                                                                                                                                                                                                                                                                                                                                                                                                                                                                                                                                                                                                                                                                                                                 |
| Complete List of Authors:       | Zhang, Lin; Sichuan University West China Hospital, Department of Neurology<br>Zhu, Xi; Sichuan University West China Hospital, Department of Neurology<br>Qiu, XIangmiao; Sichuan University West China Hospital, Department of Neurology<br>Li, Yajiao; Sichuan University West China Hospital, Department of Cardiology<br>Chen, Yucheng; Sichuan University West China Hospital, Department of Cardiology<br>Wang, Hui; Sichuan University West China Hospital, Department of Cardiology<br>He, Shixu; Sichuan University West China Hospital, Department of Neurology<br>Lai, Wanlin; Sichuan University West China Hospital, Department of Neurology<br>Peng, Anjiao; Sichuan University West China Hospital, Department of Neurology<br>Ning, Mingming; Cardio-Neurology Clinic, Massachusetts General Hospital, Harvard Medical School, Department of Neurology<br>Chen, Lei; Sichuan University West China Medical Center, Department of Neurology |
| <b>Primary Subject Heading</b>: | Neurology                                                                                                                                                                                                                                                                                                                                                                                                                                                                                                                                                                                                                                                                                                                                                                                                                                                                                                                                                   |
| Secondary Subject Heading:      | Epidemiology                                                                                                                                                                                                                                                                                                                                                                                                                                                                                                                                                                                                                                                                                                                                                                                                                                                                                                                                                |
| Keywords:                       | Epilepsy < NEUROLOGY, Migraine < NEUROLOGY, Right-to-left shunt                                                                                                                                                                                                                                                                                                                                                                                                                                                                                                                                                                                                                                                                                                                                                                                                                                                                                             |
|                                 |                                                                                                                                                                                                                                                                                                                                                                                                                                                                                                                                                                                                                                                                                                                                                                                                                                                                                                                                                             |

SCHOLARONE™  
Manuscripts



1  
2  
3 **The relationship between right-to-left shunt and migraine in patients with**  
4  
5 **epilepsy: a single-centre, cross-sectional study in China**  
6  
7  
8

9 Lin Zhang,<sup>1</sup> Xi Zhu,<sup>1</sup> Xiangmiao Qiu,<sup>1</sup> Yajiao Li,<sup>2</sup> Yucheng Chen,<sup>2</sup> Hui Wang,<sup>2</sup> Shixu  
10 He,<sup>1</sup> Wanlin Lai,<sup>1</sup> Anjiao Peng,<sup>1</sup> Mingming Ning,<sup>3</sup> Lei Chen<sup>1</sup>  
11  
12  
13

14  
15  
16 <sup>1</sup>Department of Neurology, West China Hospital, Sichuan University, Chengdu, China

17  
18 <sup>2</sup>Department of Cardiology, West China Hospital, Sichuan University, Chengdu,  
19  
20 China

21  
22 <sup>3</sup>Department of Neurology, Cardio-Neurology Clinic, Massachusetts General Hospital,  
23  
24 Harvard Medical School, Boston, USA  
25

26  
27  
28 Email for each author: Lin Zhang ([zhanglinneur@163.com](mailto:zhanglinneur@163.com)), Xi Zhu  
29  
30 ([zhu61900@163.com](mailto:zhu61900@163.com)), Xiangmiao Qiu ([qiuxmiao@126.com](mailto:qiuxmiao@126.com)), Yajiao Li  
31  
32 ([liyajiao800@163.com](mailto:liyajiao800@163.com)), Yucheng Chen ([chenyucheng2003@126.com](mailto:chenyucheng2003@126.com)), Hui Wang  
33  
34 ([dashu1985723@163.com](mailto:dashu1985723@163.com)), Shixu He ([274464077@qq.com](mailto:274464077@qq.com)), Wanlin Lai  
35  
36 ([laiwl93@163.com](mailto:laiwl93@163.com)), Anjiao Peng ([peng\\_neurology@163.com](mailto:peng_neurology@163.com)), Mingming Ning  
37  
38 ([Ning@hms.harvard.edu](mailto:Ning@hms.harvard.edu)), Lei Chen ([leilei\\_25@126.com](mailto:leilei_25@126.com))  
39  
40  
41  
42  
43

44 Key words: right-to-left shunt; epilepsy; migraine  
45

46 Number of words (main text): 2644  
47  
48  
49  
50  
51  
52  
53  
54  
55  
56  
57

## ABSTRACT

**Objectives** To investigate the relationship between right-to-left shunt and migraine to account for the unexplained high prevalence of migraine in patients with epilepsy.

**Design** This is a cross-sectional study. The diagnosis and interview process of patients with migraine was based on the International Classification of Headache Disorders-3 beta in patients with epilepsy. Participants underwent transthoracic echocardiography (TTE) with contrast medium to identify right-to-left shunt. The highest number of microbubbles were recorded in the left atrium before the complete microbubble outflow of the right atrium. A moderate-to-large shunt was defined as the presence of 10 or more microbubbles.

**Setting** A single-centre, cross-sectional study in China, 2015-2017.

**Participants** Patients with epilepsy.

**Primary and secondary outcome measures** The primary outcome measures were the prevalence of migraine; the prevalence of right-to-left shunt in patients with migraine and those without migraine; and the prevalence of migraine in different degrees of shunting.

**Results** Three hundred thirty-nine participants with epilepsy who completed TTE were included in the analysis. The overall prevalence of migraine was 23.0%. One third of the migraineurs had mild right-to-left shunt and one fifth of the migraineurs had moderate-to-large right-to-left shunt. Patients with mild shunt did not have a higher prevalence of migraine than those without shunt (26.3% vs. 18.1%,  $p = 0.102$ ); however, a higher prevalence of migraine was found in patients with moderate-to-large shunt (39.0% vs. 18.1%, odds ratio = 2.90, 95% confidence interval = 1.41 to 5.98,  $p = 0.003$ ). Patients with migraine and patients without migraine had similar prevalence of mild shunt; however, patients with migraine had more

1  
2  
3 moderate-to-large shunt (20.5% vs. 9.6%,  $p=0.002$ ). Right-to-left shunt and female  
4  
5 were factors predicting migraine prevalence.  
6

7 **Conclusions** One fifth of migraineurs were correlated with moderate-to-large  
8  
9 right-to-left shunt, which could be an underlying cause of migraine in epilepsy.  
10  
11

### 12 13 **Strengths and limitations of this study**

- 14  
15 ▶ Cohort study with data from a large number of patients with epilepsy.
- 16  
17 ▶ We first studied the relationship between the degree of shunt and migraine in  
18  
19 patients with epilepsy.
- 20  
21 ▶ Transthoracic echocardiography with contrast medium was used as a tool to detect  
22  
23 right-to-left shunt but not transoesophageal echocardiography.  
24  
25  
26  
27  
28  
29  
30  
31  
32  
33  
34  
35  
36  
37  
38  
39  
40  
41  
42  
43  
44  
45  
46  
47  
48  
49  
50  
51  
52  
53  
54  
55  
56  
57  
58  
59  
60

## INTRODUCTION

The comorbidity of migraine is common in patients with epilepsy. The lifetime occurrence of migraine was as high as 33.6% in patients with epilepsy, representing an overall 52% increase relative to people without epilepsy.<sup>1 2</sup> Comorbid migraine may have an unfavourable effect on the prognosis of epilepsy in children and adults.<sup>3 4</sup> Evidence of genetics and animal experiments have suggested similar pathophysiological mechanisms between migraine and familial epilepsy, such as genetic variants and abnormal neuronal excitability.<sup>5-9</sup> Despite these findings, the mechanisms underlying migraine in patients with epilepsy are still controversial.

In the past 2 decades, right-to-left shunt, usually due to patent foramen ovale (PFO) and pulmonary arteriovenous shunt, have been found to be associated with migraine. A three-fold higher migraine with aura was observed in patients with right-to-left shunt compared to people without right-to-left shunt.<sup>10</sup> There are clinical trials showing that treatment for right-to-left shunt can significantly reduce headache days although the responder rate defined as a 50% reduction in migraine attacks is not different from baseline.<sup>11-14</sup> In addition, the meta-analyses showed that a complete resolution of migraine after treatment for right-to-left shunt occurred in 54% of migraine-with-aura cases and in 39% of migraine-without-aura cases.<sup>15 16</sup> Therefore, right-to-left shunt may be a fundamental cause of migraine. One of the possible mechanisms between the 2 conditions is that vasoactive chemicals triggering migraine bypass the pulmonary filter.<sup>5</sup> Right-to-left shunt may carry microemboli into the carotid circulation. Animal experiments showed that microemboli can trigger the aura phenomenon by inducing cortical spreading depression (CSD).<sup>7</sup>

Similarly, right-to-left shunt may also induce migraine by vasoactive chemicals and microemboli in patients with epilepsy. Therefore, our main aim was to investigate

1  
2  
3 the relationship between right-to-left shunt and migraine to account for the  
4 unexplained high prevalence of migraine in epilepsy. We also investigated other  
5 migraine predictive factors, for example, sex, age, familial epilepsy, duration of  
6 epilepsy and antiepileptic drugs (AEDs).  
7  
8  
9  
10

## 11 12 13 **METHODS**

### 14 **Study design and patients**

15  
16 This is a cross-sectional study. Study populations were consecutively recruited  
17 between June 2015 and December 2017 from the Department of Neurology, West  
18 China Hospital, Sichuan University, China. Participants or legal guardians signed  
19 informed consent. The inclusion criteria were as follows: (1) patients with epilepsy or  
20 possible epilepsy (patients with possible epilepsy will be followed to establish the  
21 diagnosis of epilepsy); and (2) the clinical history and medical records of epilepsy can  
22 be obtained. The exclusion criteria were as follows: (1) age <3 years; (2) inaccurate  
23 communication because of language problems; (3) patients with one seizure (because  
24 high recurrence risk factors are controversial) and provoked seizures; (4) the  
25 diagnosis of epilepsy was still undetermined when we performed the data analysis; (5)  
26 the clinical history of epilepsy including onset age of seizure, AEDs, familial history  
27 of epilepsy, seizure frequency in the last year, and types of seizure were not recorded;  
28 (6) history of heart disease except right-to-left shunt; (7) right-to-left shunt confirmed  
29 by transthoracic echocardiography (TTE) at another hospital (because there may be  
30 differences between sonographers); (8) informed consent not signed; and (9) patients  
31 did not complete the interview process for the diagnosis of migraine.  
32  
33  
34  
35  
36  
37  
38  
39  
40  
41  
42  
43  
44  
45  
46  
47  
48  
49  
50  
51  
52  
53  
54

### 55 **Definitions and collection of data**

56  
57  
58  
59  
60

1  
2  
3 A definitive diagnosis and classification of epilepsy met the criteria proposed by the  
4 International League Against Epilepsy (ILAE) based on the clinical history, seizure  
5 semiology, electroencephalography (EEG), and magnetic resonance imaging (MRI)  
6 findings.<sup>17</sup> For each patient, age, symptoms of seizure, onset age of seizure, AEDs,  
7 education status, seizure onset with visual symptoms, history of febrile seizure,  
8 seizure frequency in the last year, familial history of epilepsy, and types of seizure  
9 (focal onset, focal to bilateral tonic-clonic seizures, or generalized onset) were  
10 recorded.  
11  
12  
13  
14  
15  
16  
17  
18  
19

20 The diagnosis and interview process for patients with migraine were based on the  
21 International Classification of Headache Disorders (ICHD-3 beta).<sup>18</sup> The number of  
22 migraine attacks, estimated duration of migraine, location, quality, intensity (visual  
23 analogue scale, 0-10), and aura were recorded. Patients would not be classified as  
24 having migraine if only postictal and ictal migrainous headache occurred because  
25 ICHD-3 beta does not have related criteria. Every patient was diagnosed by 2  
26 neurologists separately. If the diagnosis of epilepsy and migraine was inconsistent, a  
27 third senior neurologist was asked to discuss the case further.  
28  
29  
30  
31  
32  
33  
34  
35  
36

37 For children, their parents (or the children themselves if they were old enough)  
38 were asked to give specific information about epilepsy and migraine. Medical records  
39 and seizure diaries during the last 12 months were reviewed to obtain information  
40 regarding the history of epilepsy and migraine, EEG, and MRI.  
41  
42  
43  
44  
45  
46  
47

### 48 **Transthoracic Echocardiography**

49

50 Participants underwent transthoracic echocardiography (TTE) with contrast medium  
51 and 1-5 MHz or 3-8MHz multiplane transducers in Philips IE33 to identify  
52 right-to-left shunt; this was performed by 2 experienced sonographers who also  
53  
54  
55  
56  
57  
58  
59  
60

1  
2  
3 analysed the videotapes together. Patients with other cardiac diseases (e.g., valvular  
4 heart disease and cardiomyopathy) found by TTE were excluded. A microbubble  
5 bolus of agitated solution of 9 mL saline and 1 mL air was injected into one side of  
6 the patients' antecubital veins for increased sensitivity.<sup>19 20</sup> Patients were assessed for  
7 right-to-left shunt at rest and during the Valsalva manoeuvre and coughing. The  
8 highest number of microbubbles were recorded in the left atrium before the complete  
9 microbubble outflow of the right atrium. If 3 or more microbubbles appeared, a  
10 right-to-left shunt was diagnosed. The degree of shunting was defined as grade 0 if 0  
11 to 2 microbubbles occurred, grade 1 (mild) if 3 to 9 microbubbles occurred, grade 2  
12 (moderate) if 10 to 30 microbubbles occurred and grade 3 (large) if more than 30  
13 microbubbles occurred.<sup>21</sup>

### 24 25 26 27 28 **Data analysis**

29 Data were collected using the same standard forms in Microsoft Excel (version 2013).  
30 Continuous variables were compared by analysis of variance (ANOVA). Categorical  
31 variables were compared using the chi-square test or Fisher's exact test, as appropriate.  
32 Bonferroni correction was used if necessary. Logistic regression analyses were used to  
33 determine whether some variables were migraine-predicting factors. For all statistical  
34 tests,  $p < 0.05$  was determined to be statistically significant. Statistics were performed  
35 using the SPSS statistical package (version 21.0).  
36  
37  
38  
39  
40  
41  
42  
43  
44  
45  
46  
47

### 48 **Patient and public involvement**

49 The development of the research question and outcome measures were informed by  
50 published literature on PFO and migraine. Patients' priorities, experience and  
51 preferences were not involved in designing the study. Patients who agreed to enrol to  
52  
53  
54  
55  
56  
57  
58  
59  
60

1  
2  
3 the study received TTE. Two authors (Lin Zhang and Xi Zhu) disseminated the results  
4  
5 to the study participants by interviews.  
6  
7

## 8 9 **RESULTS**

10  
11 We carefully interviewed 532 patients with seizure (s) or (and) their parents. One  
12  
13 hundred sixty-one patients were excluded. The reasons for exclusion are shown in  
14  
15 figure 1. Three hundred thirty-nine participants with epilepsy who completed the  
16  
17 interview process of migraine and TTE were included in the analysis. The details of  
18  
19 migraine features according to the ICHD-3 beta criteria are shown in Supplementary  
20  
21 file 1. The overall prevalence of migraine was 23.0% (table 1). A greater percentage  
22  
23 of females had migraines than males (28.8% vs. 17.2%,  $p = 0.022$ ). Patients  $> 16$   
24  
25 years seemed to have a higher prevalence of migraine than those  $\leq 16$  years of age  
26  
27 (25.7% vs. 11.0%,  $p = 0.039$ ). If the duration of epilepsy was more than 10 years,  
28  
29 patients were more likely to have migraines (34.6% vs. 17.9%,  $p = 0.001$ ). Patients  
30  
31 with polytherapy may have more migraines (28.0% vs. 19.0%,  $p = 0.052$ ). Patients  
32  
33 with first-degree and second-degree relatives with epilepsy, as well as a history of  
34  
35 febrile seizures, may not have more migraines. Patients who have visual symptoms at  
36  
37 the onset of seizures did not have more migraines than those without visual symptoms  
38  
39 (data not shown).  
40  
41  
42  
43

44 One third of migraineurs have mild right-to-left shunt (table 1 and table 2). Patients  
45  
46 with mild right-to-left shunt did not have a higher prevalence of migraine than those  
47  
48 without right-to-left shunt (26.3% vs 18.1%, odds ratio = 1.61, 95% confidence  
49  
50 interval = 0.91 to 2.87,  $p = 0.102$ ). In our cohort, 33.3% (26 of 78) of patients with  
51  
52 epilepsy and with migraine and 28.0% (73 of 261) of patients with epilepsy and  
53  
54 without migraine had mild right-to-left shunt ( $p = 0.361$ ).  
55  
56  
57  
58  
59  
60



1  
2  
3 One fifth of migraineurs have moderate-to-large right-to-left shunt (table 1 and  
4 table 2). Patients with moderate-to-large right-to-left shunt had a higher prevalence of  
5 migraine than those without right-to-left shunt (39.0% vs. 18.1%, odds ratio = 2.90,  
6 95% confidence interval = 1.41 to 5.98,  $p = 0.003$ ). Twenty-one percent (16 of 78) of  
7 patients with epilepsy and with migraine had moderate-to-large right-to-left shunt;  
8 whereas only 10% (25 of 261) of patients with epilepsy and without migraine had  
9 moderate-to-large right-to-left shunt (odds ratio = 2.44, 95% confidence interval =  
10 1.23 to 4.84,  $p=0.002$ ). After controlling for potential confounders, there are  
11 significant differences of migraine prevalence between the groups with right-to-left  
12 shunt grade 2-3 versus the group with right-to-left shunt grade 0 (table 2). Therefore,  
13 moderate-to-large right-to-left shunt but not mild right-to-left shunt was associated  
14 with migraine in patients with epilepsy.  
15  
16  
17  
18  
19  
20  
21  
22  
23  
24  
25  
26  
27

28 We used a logistic regression analysis to identify the possible factors predicting  
29 migraine prevalence, such as gender, duration of epilepsy, current age, right-to-left  
30 shunt and number of antiepileptic drugs (table 3). Right-to-left shunt and female were  
31 factors predicting migraine prevalence. Although patients with duration of  
32 epilepsy >10 years and older age have a higher migraine prevalence (table 1), the  
33 logistic regression analysis showed no significant statistical difference.  
34  
35  
36  
37  
38  
39  
40  
41

42 PFO closure were performed in 7 patients. Four patients were followed for 6  
43 months. We found that PFO closure fully controlled migraine in 2 of 4 cases. Before  
44 PFO closure, the two patients have more than 11 migraine attacks in the last year.  
45 More interesting, the frequency of seizures in 3 patients with migraine after PFO  
46 closure decreased significantly.  
47  
48  
49  
50  
51  
52  
53  
54

## 55 DISCUSSION

56  
57  
58  
59  
60

1  
2  
3 This is the first study to evaluate the relationship between migraine and right-to-left  
4 shunt in a large number of patients with epilepsy. Our main findings were as follows:  
5  
6 1) one third of the migraineurs have mild right-to-left shunt and one fifth of the  
7 migraineurs have moderate-to-large right-to-left shunt; 2) patients with mild  
8 right-to-left shunt did not have a higher prevalence of migraine than those without  
9 right-to-left shunt; 3) moderate-to-large right-to-left shunt was associated with  
10 migraine in patients with epilepsy and 4) right-to-left shunt and female were factors  
11 predicting migraine prevalence in patients with epilepsy.  
12  
13  
14  
15  
16  
17  
18  
19

20  
21 Migraine in patients without epilepsy has been proved to be associated with CSD  
22 and activation of the trigeminovascular system and its constituent neuropeptides.<sup>22</sup> In  
23 addition, recent studies also suggested the cortical excitatory/inhibitory imbalance due  
24 to neuronal and glial ion channels renders patients more vulnerable to an headache  
25 attack.<sup>22</sup> Migraine in patients with epilepsy is not only associated with the  
26 aforementioned mechanisms, but also is usually considered to be associated with  
27 abnormal neuronal excitability induced by genetic variants.<sup>5-9</sup> However, the high  
28 prevalence of migraine in patients with epilepsy cannot be fully explained by genetic  
29 variants. In the past 2 decades, right-to-left shunt have been found to be associated  
30 with migraine in patients without epilepsy. Our major hypothesis was that right-to-left  
31 shunt may also be one of the pathophysiological mechanisms of migraine in patients  
32 with epilepsy. The results showed that mild right-to-left shunt was not associated with  
33 migraine in patients with epilepsy. Almost one fifth of migraine were correlated with  
34 moderate-to-large right-to-left shunt, which could be an underlying cause of migraine  
35 in epilepsy. The mechanisms of the relationship between moderate-to-large  
36 right-to-left shunt and migraine remains speculative. A previous study showed that  
37 larger right-to-left shunt tend to trigger migraine attacks because of the increased  
38  
39  
40  
41  
42  
43  
44  
45  
46  
47  
48  
49  
50  
51  
52  
53  
54  
55  
56  
57  
58  
59  
60

1  
2  
3 extent of the shunt.<sup>23</sup> Larger shunt allow harmful circulatory factors, such as  
4 vasoactive substances and microemboli which are eliminated by lung, to bypass the  
5 pulmonary filter and travel directly from the venous to the cerebral artery.  
6  
7 Right-to-left shunt and higher rates of Doppler-detected cerebral microemboli have  
8  
9 been reported to be associated.<sup>24</sup> In an animal experiment, air microemboli are able to  
10  
11 trigger CSD and migraine aura often with transient microvascular occlusion that is  
12  
13 insufficient to cause a permanent ischemic lesion.<sup>7</sup> In humans, diagnostic microbubble  
14  
15 injection also induced attacks of migraine with aura.<sup>25</sup> Therefore, microemboli may be  
16  
17 a key role linking CSD, migraine, and moderate-to-large shunt.  
18  
19  
20  
21

22 Interestingly, CSD increases neuronal excitability and triggers ictiform activity in  
23  
24 neuronal tissues with partial impairment of inhibitory.<sup>9</sup> CSD also triggers migraine  
25  
26 headache by activating neuronal Panx1 channels, which contributes to neuronal  
27  
28 hyperactivity in seizures.<sup>26,27</sup> These findings may explain why migraine may have an  
29  
30 unfavourable effect on the prognosis of epilepsy.<sup>3,4</sup> Therefore, moderate-to-large  
31  
32 right-to-left shunt may not only be an underlying cause of migraine but also an  
33  
34 adverse prognostic factor in patients with epilepsy. Whether moderate-to-large  
35  
36 right-to-left shunt is an adverse prognostic factors in epilepsy should also be  
37  
38 investigated.  
39  
40

41 The effect of PFO closure for migraine treatment still remains controversial.  
42  
43 Randomised controlled trials (RCTs) looking at the effect of PFO closure on migraine  
44  
45 were initially conducted. There are clinical trials showing that treatment for  
46  
47 right-to-left shunt did not increase responder rate defined as 50% reduction in  
48  
49 migraine attacks; however, it significantly reduced headache days.<sup>11-14</sup> Similarly to the  
50  
51 stroke trials, they had initial negative RCTs. With better patient selection and longer  
52  
53 follow-up, subsequent trials may show more cessation of migraine headache.<sup>28</sup> In our  
54  
55  
56  
57  
58  
59  
60

1  
2  
3 cohort, we found that PFO closure fully controlled migraine in 2 of 4 cases. More  
4 interesting, the frequency of seizures in 3 patients with migraine after surgery  
5 decreased significantly. Although these cases need to be explained with caution, it is  
6 worth investigating in the future whether PFO closure improve migraine attacks and  
7 seizure outcomes. In addition, given the subjective nature of migraines and their  
8 vulnerability to bias and the placebo effect, perhaps a large, well-designed sham  
9 controlled trial with modern devices is required. If treatment for right-to-left shunt  
10 have been shown to be definitely effective, right-to-left shunt should be screened in  
11 patients with epilepsy and with migraine.  
12  
13  
14  
15  
16  
17  
18  
19  
20  
21

22 This study has some limitations. First, transoesophageal echocardiography (TEE) is  
23 a gold standard diagnostic tool with a sensitivity and specificity of 80% to 100% for  
24 the detection of a right-to-left shunt.<sup>19 20</sup> The contrast TTE used by us has a lower  
25 sensitivity than TEE.<sup>19</sup> However, harmonic imaging improves sensitivity for the  
26 detection of right-to-left shunt, ranging from 66% to 100%.<sup>19 20 29 30</sup> In addition, TTE  
27 is not inferior to TEE in the assessment of large shunt because TEE may miss large  
28 shunt detected by TTE.<sup>30</sup> In our study, moderate-to-large right-to-left shunt are more  
29 likely to be associated with migraine; therefore, TTE may not be an inferior choice to  
30 TEE. Second, the population may be biased because a few patients did not complete  
31 TTE. However, there were no differences in demographic characteristics between  
32 patients who did or did not refuse TTE and the conclusions of our study should not be  
33 affected. Third, only Chinese people were recruited, and this limits the  
34 generalizability of results.  
35  
36  
37  
38  
39  
40  
41  
42  
43  
44  
45  
46  
47  
48  
49  
50

## 51 52 **CONCLUSIONS**

53  
54 Moderate-to-large right-to-left shunt but not mild right-to-left shunt were associated  
55  
56  
57  
58  
59  
60

1  
2  
3 with migraine. On the basis of these results, patients with epilepsy and with migraine  
4 should be screened for a right-to-left shunt if treatment for a right-to-left shunt has  
5 been shown to be effective in migraine. Whether moderate-to-large right-to-left shunt  
6 is an adverse prognostic factor in epilepsy should be also investigated.  
7  
8  
9  
10

11  
12  
13 **Acknowledgements** No patient advisers were involved in the study. We thank Dr. Qi  
14 Si for her help.  
15  
16  
17  
18  
19

20 **Contributors** Lei Chen and Mingming Ning conceived and designed the work. Lin  
21 Zhang and Xi Zhu were involved in data collection, data analysis and interpretation.  
22 Lin Zhang drafted the manuscript. Lei Chen involved in critical revision of the article  
23 and final approval of the version to be published. Xiangmiao Qiu, Xiangmiao Qiu,  
24 Shixu He, Anjiao Peng, Wanlin Lai, Yajiao Li, Yucheng Chen, and Hui Wang were  
25 involved in the data collection and final approval of the version to be published. All  
26 authors have agreed to be accountable for all aspects of the work.  
27  
28  
29  
30  
31  
32  
33  
34  
35  
36

37 **Funding** Funding for this study was provided by China Association Against Epilepsy  
38 (No.2016005).  
39  
40  
41  
42  
43

44 **Competing interests** None declared.  
45  
46  
47

48 **Patient consent** Obtained.  
49  
50  
51

52 **Ethics approval** The protocol was approved by the Ethics Committee of the West  
53 China Hospital of Sichuan University.  
54  
55  
56  
57  
58  
59  
60

**Data sharing statement** No additional data available.

## REFERENCES

1. Keezer MR, Bauer PR, Ferrari MD, *et al.* The comorbid relationship between migraine and epilepsy: a systematic review and meta-analysis. *Eur J Neurol* 2015;22:1038-47.
2. Le H, Tfelt-Hansen P, Russell MB, *et al.* Co-morbidity of migraine with somatic disease in a large population-based study. *Cephalalgia* 2011;31:43-64.
3. Dragoumi P, Tzetzis O, Vargiami E, *et al.* Clinical course and seizure outcome of idiopathic childhood epilepsy: determinants of early and long-term prognosis. *BMC Neurol* 2013;13:206.
4. Velioglu SK, Boz C, Ozmenoglu M. The impact of migraine on epilepsy: a prospective prognosis study. *Cephalalgia* 2005;25:528-35.
5. Finocchi C, Del Sette M. Migraine with aura and patent foramen ovale: myth or reality? *Neurol Sci* 2015;36 Suppl 1:61-6.
6. Ludvigsson P, Hesdorffer D, Olafsson E, *et al.* Migraine with aura is a risk factor for unprovoked seizures in children. *Ann Neurol* 2006;59:210-3.
7. Nozari A, Dilekoz E, Sukhotinsky I, *et al.* Microemboli may link spreading depression, migraine aura, and patent foramen ovale. *Ann Neurol* 2010;67:221-9.
8. Winawer MR, Connors R. Evidence for a shared genetic susceptibility to migraine and epilepsy. *Epilepsia* 2013;54:288-95.

- 1  
2  
3  
4 9. Eickhoff M, Kovac S, Shahabi P, *et al.* Spreading depression triggers ictiform  
5 activity in partially disinhibited neuronal tissues. *Exp Neurol* 2014;253:1-15.  
6  
7
- 8  
9 10. Wammes-van der Heijden EA, Tijssen CC, Egberts AC. Right-to-left shunt  
10 and migraine: the strength of the relationship. *Cephalalgia* 2006;26:208-13.  
11  
12
- 13 11. Xing YQ, Guo YZ, Gao YS, *et al.* Effectiveness and Safety of Transcatheter  
14 Patent Foramen Ovale Closure for Migraine (EASTFORM) Trial. *Sci Rep*  
15 2016;6:39081.  
16  
17
- 18 12. Tobis JM, Charles A, Silberstein SD, *et al.* Percutaneous Closure of Patent  
19 Foramen Ovale in Patients With Migraine: The PREMIUM Trial. *J Am Coll*  
20 *Cardiol* 2017;70:2766-74.  
21  
22
- 23 13. Dowson A, Mullen MJ, Peatfield R, *et al.* Migraine Intervention With  
24 STARFlex Technology (MIST) trial: a prospective, multicenter, double-blind,  
25 sham-controlled trial to evaluate the effectiveness of patent foramen ovale  
26 closure with STARFlex septal repair implant to resolve refractory migraine  
27 headache. *Circulation* 2008;117:1397-404.  
28  
29
- 30 14. Mattle HP, Evers S, Hildick-Smith D, *et al.* Percutaneous closure of patent  
31 foramen ovale in migraine with aura, a randomized controlled trial. *Eur Heart*  
32 *J* 2016;37:2029-36.  
33  
34
- 35 15. Kanwar SM, Noheria A, DeSimone CV, *et al.* Coincidental Impact of  
36 Transcatheter Patent Foramen Ovale Closure on Migraine with and without  
37 Aura - A Comprehensive Meta-Analysis. *Clin Trials Regul Sci Cardiol*  
38 2016;15:7-13.  
39  
40  
41  
42  
43  
44  
45  
46  
47  
48  
49  
50  
51  
52  
53  
54  
55  
56  
57  
58  
59  
60

- 1  
2  
3  
4  
5  
6  
7  
8  
9  
10  
11  
12  
13  
14  
15  
16  
17  
18  
19  
20  
21  
22  
23  
24  
25  
26  
27  
28  
29  
30  
31  
32  
33  
34  
35  
36  
37  
38  
39  
40  
41  
42  
43  
44  
45  
46  
47  
48  
49  
50  
51  
52  
53  
54  
55  
56  
57  
58  
59  
60
16. Shi YJ, Lv J, Han XT, *et al.* Migraine and percutaneous patent foramen ovale closure: a systematic review and meta-analysis. *BMC Cardiovasc Disord* 2017;17:203.
17. Fisher RS, Cross JH, French JA, *et al.* Operational classification of seizure types by the International League Against Epilepsy: Position Paper of the ILAE Commission for Classification and Terminology. *Epilepsia* 2017;58:522-30.
18. Ettl DA. The International Classification of Headache Disorders, 3rd edition (beta version). *Cephalalgia* 2013;33:629-808.
19. Cotter PE, Martin PJ, Belham M. Improved sensitivity of transthoracic contrast echocardiography in the detection of right-to-left shunts. *J Am Soc Echocardiogr* 2010;23:578; author reply 78-9.
20. Ha JW, Shin MS, Kang S, *et al.* Enhanced detection of right-to-left shunt through patent foramen ovale by transthoracic contrast echocardiography using harmonic imaging. *Am J Cardiol* 2001;87:669-71.
21. Mas JL, Arquizan C, Lamy C, *et al.* Recurrent cerebrovascular events associated with patent foramen ovale, atrial septal aneurysm, or both. *N Engl J Med* 2001;345:1740-6.
22. Pietrobon D, Moskowitz MA. Pathophysiology of migraine. *Annu Rev Physiol* 2013;75:365-91.
23. Tembl J, Lago A, Sevilla T, *et al.* Migraine, patent foramen ovale and migraine triggers. *J Headache Pain* 2007;8:7-12.



- 1  
2  
3  
4 24. Rodriguez RA, Sinclair B, Weatherdon D, *et al.* Patent foramen ovale and  
5  
6 brain microembolization during scoliosis surgery in adolescents. *Spine (Phila*  
7  
8 *Pa 1976)* 2001;26:1719-21.
- 9  
10  
11 25. Dinia L, Roccatagliata L, Bonzano L, *et al.* Diffusion MRI during migraine  
12  
13 with aura attack associated with diagnostic microbubbles injection in subjects  
14  
15 with large PFO. *Headache* 2007;47:1455-6.
- 16  
17  
18 26. Karatas H, Erdener SE, Gursoy-Ozdemir Y, *et al.* Spreading depression  
19  
20 triggers headache by activating neuronal Panx1 channels. *Science*  
21  
22 2013;339:1092-5.
- 23  
24  
25 27. Santiago MF, Veliskova J, Patel NK, *et al.* Targeting pannexin1 improves  
26  
27 seizure outcome. *PLoS One* 2011;6:e25178.
- 28  
29  
30 28. Mojadidi MK, Zaman MO, Elgendy IY, *et al.* Cryptogenic Stroke and Patent  
31  
32 Foramen Ovale. *J Am Coll Cardiol* 2018;71:1035-43.
- 33  
34  
35 29. Clarke NR, Timperley J, Kelion AD, *et al.* Transthoracic echocardiography  
36  
37 using second harmonic imaging with Valsalva manoeuvre for the detection of  
38  
39 right to left shunts. *Eur J Echocardiogr* 2004;5:176-81.
- 40  
41  
42 30. Daniels C, Weytjens C, Cosyns B, *et al.* Second harmonic transthoracic  
43  
44 echocardiography: the new reference screening method for the detection of  
45  
46 patent foramen ovale. *Eur J Echocardiogr* 2004;5:449-52.
- 47  
48  
49  
50  
51  
52  
53  
54  
55  
56  
57  
58  
59  
60

**Table 1 Migraine prevalence in different groups**

| Characteristics                    | Sample | Migraine (%) | P values |
|------------------------------------|--------|--------------|----------|
| Gender                             |        |              | 0.022    |
| Male                               | 169    | 29 (17.2)    |          |
| Female                             | 170    | 49 (28.8)    |          |
| Current age, years                 |        |              | 0.039    |
| ≤16                                | 82     | 12 (11.0)    |          |
| >16                                | 257    | 66 (25.7)    |          |
| Duration of epilepsy, years        |        |              | 0.001    |
| ≤10                                | 235    | 42 (17.9)    |          |
| >10                                | 104    | 36 (34.6)    |          |
| Onset age, years                   |        |              | 0.421    |
| ≤16                                | 183    | 39 (21.3)    |          |
| >16                                | 156    | 39 (25.0)    |          |
| Seizure frequency in the last year |        |              | 0.256    |
| 0-12                               | 246    | 56 (22.8)    |          |
| 13-52                              | 33     | 11 (33.3)    |          |
| >52                                | 28     | 7 (25.0)     |          |
| Unknown                            | 32     | 4 (12.5)     |          |
| Number of AEDs                     |        |              | 0.052    |
| < or = 1                           | 189    | 36 (19.0)    |          |
| > or = 2                           | 150    | 42 (28.0)    |          |
| AEDs                               |        |              | 0.299    |
| Topiramate                         | 66     | 20 (30.3)    |          |
| Valproate                          | 126    | 29 (23.0)    |          |

|    |                                     |     |           |       |
|----|-------------------------------------|-----|-----------|-------|
| 1  |                                     |     |           |       |
| 2  |                                     |     |           |       |
| 3  | Levetiracetam                       | 94  | 26 (27.7) |       |
| 4  |                                     |     |           |       |
| 5  | Oxcarbazepine                       | 94  | 19 (20.2) |       |
| 6  |                                     |     |           |       |
| 7  | Lamotrigine                         | 27  | 2 (7.4)   |       |
| 8  |                                     |     |           |       |
| 9  | Carbamazepine                       | 67  | 19 (28.4) |       |
| 10 |                                     |     |           |       |
| 11 | Phenytoin                           | 20  | 4 (20.0)  |       |
| 12 |                                     |     |           |       |
| 13 | Phenobarbital                       | 12  | 2 (16.7)  |       |
| 14 |                                     |     |           |       |
| 15 | Seizure types                       |     |           | 0.319 |
| 16 |                                     |     |           |       |
| 17 | Focal onset seizure                 | 68  | 10 (14.7) |       |
| 18 |                                     |     |           |       |
| 19 | Generalized onset seizure and focal | 227 | 58 (25.6) |       |
| 20 |                                     |     |           |       |
| 21 | to bilateral tonic-clonic seizures  |     |           |       |
| 22 |                                     |     |           |       |
| 23 | Undetermined                        | 44  | 10 (22.7) |       |
| 24 |                                     |     |           |       |
| 25 | Familial epilepsy                   | 11  | 5 (45.5)  | 0.135 |
| 26 |                                     |     |           |       |
| 27 | First-degree relatives              | 9   | 4 (44.4)  |       |
| 28 |                                     |     |           |       |
| 29 | Second-degree relatives             | 2   | 1 (50.0)  |       |
| 30 |                                     |     |           |       |
| 31 | No familial epilepsy                | 328 | 73 (22.3) |       |
| 32 |                                     |     |           |       |
| 33 | Right-to-left shunt                 |     |           |       |
| 34 |                                     |     |           |       |
| 35 | Grade 1                             | 99  | 26 (26.3) | 0.102 |
| 36 |                                     |     |           |       |
| 37 | Grade 2-3                           | 41  | 16 (39.0) | 0.003 |
| 38 |                                     |     |           |       |
| 39 | Grade 1-3                           | 140 | 42 (29.6) | 0.010 |
| 40 |                                     |     |           |       |
| 41 | Grade 0                             | 199 | 36 (18.1) |       |
| 42 |                                     |     |           |       |
| 43 |                                     |     |           |       |
| 44 |                                     |     |           |       |
| 45 |                                     |     |           |       |

---

AEDs, antiepileptic drugs.

**Table 2 High prevalence of migraine in patients with moderate to large right-to-left shunt**

| Characteristics                                                        | Right-to-left shunt |                |                 | P     |
|------------------------------------------------------------------------|---------------------|----------------|-----------------|-------|
|                                                                        | Grade 2-3 (n=41)    | Grade 1 (n=99) | Grade 0 (n=199) |       |
| Male, n (%)                                                            | 17 (41.5)           | 52 (52.5)      | 100 (50.3)      | 0.413 |
| Age, years                                                             | 26.9 ± 11.7         | 27.6 ± 13.7    | 26.4 ± 13.2     | 0.769 |
| Onset age, years                                                       | 19.3 ± 11.2         | 17.9 ± 12.4    | 17.8 ± 12.3     | 0.779 |
| Duration, years                                                        | 8.1 ± 8.9           | 9.7 ± 9.6      | 8.7 ± 9.1       | 0.580 |
| Familial epilepsy, n (%)                                               | 2                   | 2              | 7               | 0.648 |
| Education, n (%)                                                       |                     |                |                 | 0.772 |
| 0-6, years                                                             | 13 (31.7)           | 24 (24.2)      | 52 (26.1)       |       |
| 7-12, years                                                            | 20 (48.8)           | 47 (47.5)      | 104 (52.3)      |       |
| ≥13, years                                                             | 8 (19.5)            | 28 (28.3)      | 43 (21.6)       |       |
| Seizure types, n (%)                                                   |                     |                |                 | 0.085 |
| Focal onset                                                            | 7 (17.1)            | 22 (22.2)      | 39 (19.6)       |       |
| Generalized onset seizure and focal to bilateral tonic-clonic seizures | 32 (78.0)           | 69 (69.7)      | 126 (63.3)      |       |
| Undetermined                                                           | 2 (4.9)             | 8 (8.1)        | 34 (17.1)       |       |
| Seizure frequency in the last year, n (%)                              |                     |                |                 | 0.284 |
| 0-12                                                                   | 27 (65.9)           | 71 (71.7)      | 148 (71.4)      |       |
| 13-52                                                                  | 3 (7.3)             | 14 (14.1)      | 16 (8.0)        |       |
| >52                                                                    | 6 (14.6)            | 8 (8.1)        | 14 (7.0)        |       |

|                     |           |           |            |                    |
|---------------------|-----------|-----------|------------|--------------------|
| Unknown             | 5 (12.2)  | 6 (6.1)   | 21 (14.1)  |                    |
| Number of used AEDs |           |           |            | 0.139              |
| < or = 1, n (%)     | 25 (61.0) | 47 (47.5) | 117 (58.8) |                    |
| > or = 2, n (%)     | 16 (39.0) | 52 (52.5) | 82 (41.2)  |                    |
| AEDs                |           |           |            | 0.735              |
| Topiramate          | 10        | 21        | 35         |                    |
| Valproate           | 8         | 45        | 74         |                    |
| Levetiracetam       | 15        | 31        | 48         |                    |
| Oxcarbazepine       | 12        | 34        | 48         |                    |
| Lamotrigine         | 4         | 8         | 15         |                    |
| Carbamazepine       | 8         | 28        | 31         |                    |
| Phenytoin           | 1         | 6         | 13         |                    |
| Phenobarbital       | 1         | 4         | 7          |                    |
| Migraine, n (%)     | 16 (39.0) | 26 (26.3) | 36 (18.1)  | 0.010 <sup>a</sup> |

---

The continuous data are presented as mean  $\pm$  standard deviation.

<sup>a</sup> Bonferroni correction show statistical differences in grade 2-3 versus grade 0.

AEDs, antiepileptic drugs.

**Table 3 Logistic regression analysis for migraine predictors**

| Characteristics                   | Odds ratio | 95% confidence interval |        | P     |
|-----------------------------------|------------|-------------------------|--------|-------|
|                                   |            | Lower                   | Upper  |       |
| Male                              | 0.518      | 0.302                   | 0.891  | 0.017 |
| Current age, years                | 0.978      | 0.956                   | 1.001  | 0.057 |
| Right-to-left shunt               | 2.200      | 1.274                   | 3.797  | 0.005 |
| Duration of epilepsy, years       | 0.974      | 0.945                   | 1.004  | 0.085 |
| Familial epilepsy                 | 2.828      | 0.765                   | 10.453 | 0.119 |
| Number of antiepileptic drugs > 1 | 1.354      | 0.784                   | 2.340  | 0.277 |

**Figure legends**

Figure 1. The flow diagram



Figure 1. The flow diagram

136x127mm (300 x 300 DPI)

**sTable 1** Characteristics of migraine

| Characteristics                                                               | N=78 |
|-------------------------------------------------------------------------------|------|
| <b>Criteria</b>                                                               |      |
| Duration >2 hours (<18 years) or > 4 hours ( $\geq$ 18 years) <sup>1</sup>    | 78   |
| At least 5 (without aura) attacks or 2 (with aura) attacks <sup>1</sup>       | 78   |
| Headache has at least two of the following four characteristics               | 78   |
| <b>Location</b>                                                               |      |
| Left or Right <sup>1</sup>                                                    | 46   |
| Bilateral                                                                     | 32   |
| <b>Intensity<sup>1,2</sup></b>                                                |      |
| 0-3                                                                           | 17   |
| 4-10 <sup>1</sup>                                                             | 61   |
| Pulsating quality <sup>1</sup>                                                | 53   |
| Aggravation by or causing avoidance of routine physical activity <sup>1</sup> | 51   |
| <b>During headache at least one of the following</b>                          |      |
| Nausea and/or vomiting <sup>1</sup>                                           | 62   |
| Photophobia and Phonophobia <sup>1</sup>                                      | 55   |

<sup>1</sup>Diagnostic criteria of International Classification of Headache Disorders–3

criteria (beta)

<sup>2</sup>Visual analogue scale scores



**STROBE 2007 (v4) Statement—Checklist of items that should be included in reports of *cross-sectional studies***

| Section/Topic                | Item # | Recommendation                                                                                                                                                                       | Reported on page # |
|------------------------------|--------|--------------------------------------------------------------------------------------------------------------------------------------------------------------------------------------|--------------------|
| <b>Title and abstract</b>    | 1      | (a) Indicate the study's design with a commonly used term in the title or the abstract                                                                                               | 1                  |
|                              |        | (b) Provide in the abstract an informative and balanced summary of what was done and what was found                                                                                  | 2                  |
| <b>Introduction</b>          |        |                                                                                                                                                                                      |                    |
| Background/rationale         | 2      | Explain the scientific background and rationale for the investigation being reported                                                                                                 | 3                  |
| Objectives                   | 3      | State specific objectives, including any prespecified hypotheses                                                                                                                     | 4                  |
| <b>Methods</b>               |        |                                                                                                                                                                                      |                    |
| Study design                 | 4      | Present key elements of study design early in the paper                                                                                                                              | 5                  |
| Setting                      | 5      | Describe the setting, locations, and relevant dates, including periods of recruitment, exposure, follow-up, and data collection                                                      | 5                  |
| Participants                 | 6      | (a) Give the eligibility criteria, and the sources and methods of selection of participants                                                                                          | 5                  |
| Variables                    | 7      | Clearly define all outcomes, exposures, predictors, potential confounders, and effect modifiers. Give diagnostic criteria, if applicable                                             | 5,6                |
| Data sources/<br>measurement | 8*     | For each variable of interest, give sources of data and details of methods of assessment (measurement). Describe comparability of assessment methods if there is more than one group | 5,6                |
| Bias                         | 9      | Describe any efforts to address potential sources of bias                                                                                                                            | 6,11               |
| Study size                   | 10     | Explain how the study size was arrived at                                                                                                                                            | NA                 |
| Quantitative variables       | 11     | Explain how quantitative variables were handled in the analyses. If applicable, describe which groupings were chosen and why                                                         | 6,7                |
| Statistical methods          | 12     | (a) Describe all statistical methods, including those used to control for confounding                                                                                                | 7                  |
|                              |        | (b) Describe any methods used to examine subgroups and interactions                                                                                                                  | 7                  |
|                              |        | (c) Explain how missing data were addressed                                                                                                                                          | NA                 |
|                              |        | (d) If applicable, describe analytical methods taking account of sampling strategy                                                                                                   | NA                 |
|                              |        | (e) Describe any sensitivity analyses                                                                                                                                                | NA                 |
| <b>Results</b>               |        |                                                                                                                                                                                      |                    |

|                          |     |                                                                                                                                                                                                              |         |
|--------------------------|-----|--------------------------------------------------------------------------------------------------------------------------------------------------------------------------------------------------------------|---------|
| Participants             | 13* | (a) Report numbers of individuals at each stage of study—eg numbers potentially eligible, examined for eligibility, confirmed eligible, included in the study, completing follow-up, and analysed            | 7,8     |
|                          |     | (b) Give reasons for non-participation at each stage                                                                                                                                                         | 7       |
|                          |     | (c) Consider use of a flow diagram                                                                                                                                                                           | 7       |
| Descriptive data         | 14* | (a) Give characteristics of study participants (eg demographic, clinical, social) and information on exposures and potential confounders                                                                     | 7,8     |
|                          |     | (b) Indicate number of participants with missing data for each variable of interest                                                                                                                          | NA      |
| Outcome data             | 15* | Report numbers of outcome events or summary measures                                                                                                                                                         | 8       |
| Main results             | 16  | (a) Give unadjusted estimates and, if applicable, confounder-adjusted estimates and their precision (eg, 95% confidence interval). Make clear which confounders were adjusted for and why they were included | 7,8     |
|                          |     | (b) Report category boundaries when continuous variables were categorized                                                                                                                                    | 7       |
|                          |     | (c) If relevant, consider translating estimates of relative risk into absolute risk for a meaningful time period                                                                                             | NA      |
| Other analyses           | 17  | Report other analyses done—eg analyses of subgroups and interactions, and sensitivity analyses                                                                                                               | 8       |
| <b>Discussion</b>        |     |                                                                                                                                                                                                              |         |
| Key results              | 18  | Summarise key results with reference to study objectives                                                                                                                                                     | 9       |
| Limitations              | 19  | Discuss limitations of the study, taking into account sources of potential bias or imprecision. Discuss both direction and magnitude of any potential bias                                                   | 11      |
| Interpretation           | 20  | Give a cautious overall interpretation of results considering objectives, limitations, multiplicity of analyses, results from similar studies, and other relevant evidence                                   | 9,10,11 |
| Generalisability         | 21  | Discuss the generalisability (external validity) of the study results                                                                                                                                        | 11      |
| <b>Other information</b> |     |                                                                                                                                                                                                              |         |
| Funding                  | 22  | Give the source of funding and the role of the funders for the present study and, if applicable, for the original study on which the present article is based                                                | 12      |

\*Give information separately for cases and controls in case-control studies and, if applicable, for exposed and unexposed groups in cohort and cross-sectional studies.

**Note:** An Explanation and Elaboration article discusses each checklist item and gives methodological background and published examples of transparent reporting. The STROBE checklist is best used in conjunction with this article (freely available on the Web sites of PLoS Medicine at <http://www.plosmedicine.org/>, Annals of Internal Medicine at <http://www.annals.org/>, and Epidemiology at <http://www.epidem.com/>). Information on the STROBE Initiative is available at [www.strobe-statement.org](http://www.strobe-statement.org).
