# Supplementary material for: Relationship between right-to-left shunt and migraine in patients with epilepsy: a single-centre, cross-sectional study in China
Source: PubMed Central journal article supplement — BMJ Open. 2018 Oct 8;8(10):e024144. doi: 10.1136/bmjopen-2018-024144 (PMC6194457; doi:10.1136/bmjopen-2018-024144), 2018-10-08
Supplement: bmjopen-2018-024144supp001.pdf [file bmjopen-2018-024144supp001.pdf]

**sTable 1** Characteristics of migraine

| Characteristics                                                               | N=78 |
|-------------------------------------------------------------------------------|------|
| <b>Criteria</b>                                                               |      |
| Duration >2 hours (<18 years) or > 4 hours ( $\geq$ 18 years) <sup>1</sup>    | 78   |
| At least 5 (without aura) attacks or 2 (with aura) attacks <sup>1</sup>       | 78   |
| Headache has at least two of the following four characteristics               | 78   |
| <b>Location</b>                                                               |      |
| Left or Right <sup>1</sup>                                                    | 46   |
| Bilateral                                                                     | 32   |
| <b>Intensity<sup>1,2</sup></b>                                                |      |
| 0-3                                                                           | 17   |
| 4-10 <sup>1</sup>                                                             | 61   |
| Pulsating quality <sup>1</sup>                                                | 53   |
| Aggravation by or causing avoidance of routine physical activity <sup>1</sup> | 51   |
| During headache at least one of the following                                 | 78   |
| Nausea and/or vomiting <sup>1</sup>                                           | 62   |
| Photophobia and Phonophobia <sup>1</sup>                                      | 55   |

<sup>1</sup>Diagnostic criteria of International Classification of Headache Disorders–3 criteria (beta)

<sup>2</sup>Visual analogue scale scores
